# Supplementary material for: Diagnosing flow residuals in coiled cerebral aneurysms by MR angiography: meta-analysis
Source: Springer Nature journal article supplement (doi:10.1007/s00415-013-7053-5), 2013-07-27
Supplement: MOESM1 [file 8458786]

## SUPPLEMENT: Table of Content

| <b>Supplemental Material</b> |                                                                    | <b>Page</b> |
|------------------------------|--------------------------------------------------------------------|-------------|
| <b>eFig. 1</b>               | <b>Summary of Study Quality</b>                                    | 2           |
| <b>eTable 1</b>              | <b>Literature Search</b>                                           | 3           |
| <b>eTable 2</b>              | <b>Bivariate Likelihood Ratios and Conditional Probabilities</b>   |             |
|                              | A. Estimation of bivariate post-test probabilities                 | 4           |
|                              | B. Bivariate likelihood ratios for assessing any residuals by MRA  | 4           |
|                              | C. Bivariate likelihood ratios for assessing sac residuals by MRA  | 4           |
| <b>eTable 3</b>              | <b>Trivariate Likelihood Ratios and Conditional Probabilities</b>  |             |
|                              | A. Estimation of trivariate post-test probabilities                | 5           |
|                              | B. Trivariate likelihood ratios for assessing sac residuals by MRA | 5           |
| <b>eTable 4</b>              | <b>Study Characteristics</b>                                       |             |
|                              | A. Study Design                                                    | 6           |
|                              | B. Patients and Coiled Aneurysms                                   | 7–8         |
|                              | C. Index Test (MRA)                                                | 9–12        |
|                              | D. Reference Test (DSA)                                            | 13          |
| <b>eTable 5</b>              | <b>Excluded Patients and Aneurysms</b>                             |             |
|                              | A. Exclusion of Patients from the Studies                          | 14–15       |
|                              | B. Exclusion of MRAs and Aneurysms from Analysis                   | 16          |
| <b>eTable 6</b>              | <b>Bivariate Count Data of MRA versus DSA</b>                      |             |
|                              | A. Bivariate Assessment of Any Residuals                           | 17–18       |
|                              | B. Bivariate Assessment of Sac Residuals                           | 19–20       |
| <b>eTable 7</b>              | <b>Trivariate Count Data of MRA versus DSA</b>                     | 21–22       |
| <b>eTable 8</b>              | <b>Subgroup Analyses with Study Characteristics as Covariates</b>  | 23–24       |
| <b>eTable 9</b>              | <b>Supplemental References of the Primary Studies</b>              | 25–26       |

**eFig. 1 Summary of Study Quality**

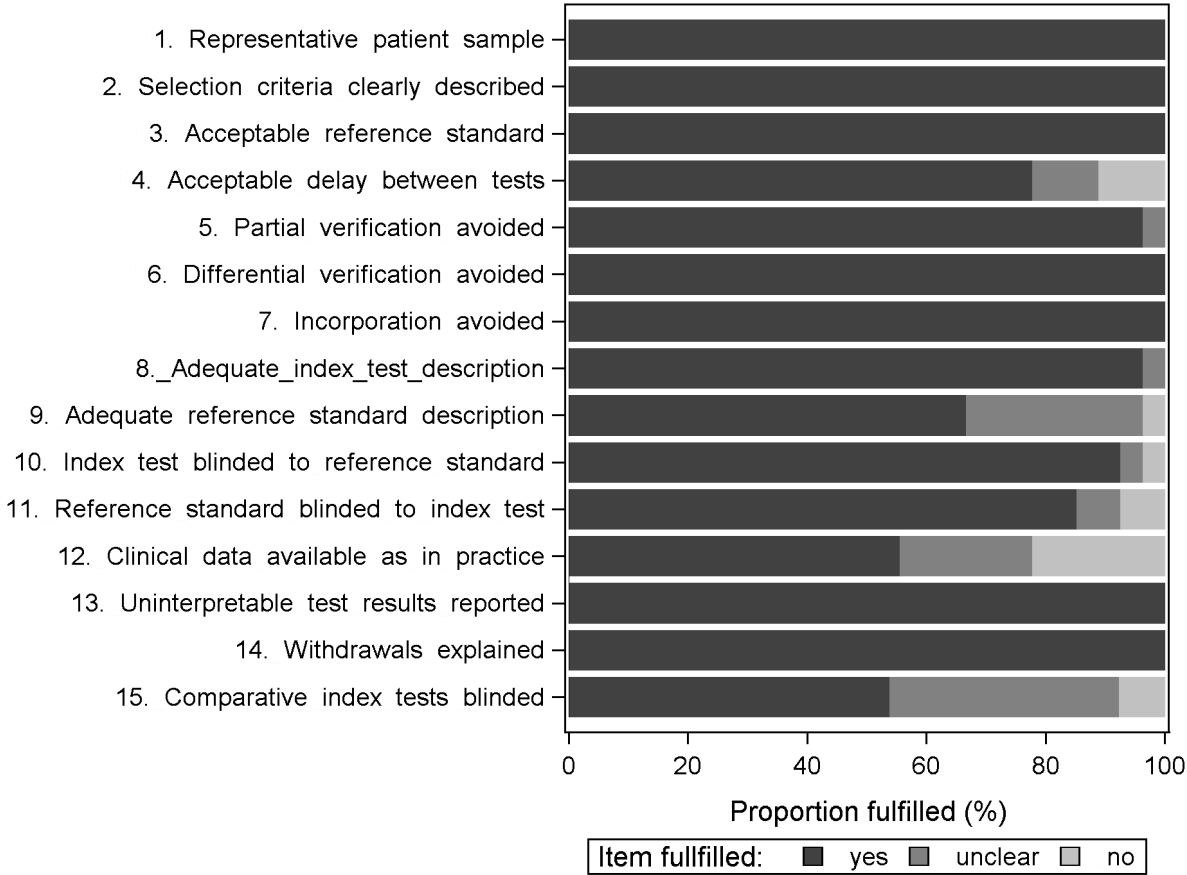

The study quality was assessed by 15 items (see Methods). The consensus judgment of two readers is shown as cumulative percentages across the 27 primary studies.

**eTable 1. Literature Search of the PubMed Database**

---

| <b>No.</b>                                | <b>Search Terms *</b>                  |
|-------------------------------------------|----------------------------------------|
| <b><i>Patient's Condition</i></b>         |                                        |
| #1.                                       | aneurysm*                              |
| #2.                                       | coil*                                  |
| #3.                                       | #1 and #2                              |
| <b><i>Index Test</i></b>                  |                                        |
| #4.                                       | magnetic resonance angiography         |
| #5.                                       | MR angiography                         |
| #6.                                       | MRA                                    |
| #7.                                       | MR angiogram                           |
| #8.                                       | MR angiographic                        |
| #9.                                       | #4 or #5 or #6 or #7 or #8             |
| <b><i>Reference Method</i></b>            |                                        |
| #10.                                      | digital subtraction angiography        |
| #11.                                      | DSA                                    |
| #12.                                      | IADSA                                  |
| #13.                                      | angiography                            |
| #14.                                      | angiographic                           |
| #15.                                      | angiogram                              |
| #16.                                      | #10 or #11 or #12 or #13 or #14 or #15 |
| <b><i>Outcome Measure</i></b>             |                                        |
| (no limiting filters applied)             |                                        |
| <b><i>Combination of Search Terms</i></b> |                                        |
| #17.                                      | #3 and #9 and #16                      |
| #18.                                      | #17 2000:2013 [DP]                     |

---

\* Last searched on July 10, 2013

**eTable 2. Bivariate Likelihood Ratios and Conditional Probabilities**

**eTable 2A. Estimation of bivariate post-test probabilities**

| Symbol  | Parameter name                   | Formula                                |
|---------|----------------------------------|----------------------------------------|
| p11     | specificity (true-negative rate) | p11 = specificity                      |
| p12     | false-positive rate              | p12 = 1 – specificity                  |
| p21     | false-negative rate              | p21 = 1 – specificity                  |
| p22     | sensitivity (true-positive rate) | p22 = sensitivity                      |
| LRN     | negative likelihood ratio        | see tables B and C below               |
| LRP     | positive likelihood ratio        | see tables B and C below               |
| preP    | pre-test probability             | can range from 0% to 100%              |
| preOR   | pre-test odds ratio              | preOR = preP / (1 – preP)              |
| NpostOR | negative post-test odds ratio    | NpostOR = preOR * LRN                  |
| PpostOR | positive post-test odds ratio    | PpostOR = preOR * LRP                  |
| NpostP  | negative post-test probability   | NpostP = 1 – (NpostOR / (1 + NpostOR)) |
| PpostP  | positive post-test probability   | PpostP = PpostOR / (1 + PpostOR)       |

**eTable 2B. Bivariate likelihood ratios for assessing any residuals by MRA\***

|                                                     | <u><b>DSA:</b></u><br>No residual | <u><b>DSA:</b></u><br>Neck residual<br>or Sac residual | <b>Likelihood Ratios</b> |
|-----------------------------------------------------|-----------------------------------|--------------------------------------------------------|--------------------------|
| <u><b>MRA:</b></u> No residual                      | p11                               | p21                                                    | LRN = p21 / p11          |
| <u><b>MRA:</b></u> Neck residual<br>or Sac residual | p12                               | p22                                                    | LRP = p22 / p12          |
|                                                     | sum = 100%                        | sum = 100%                                             |                          |

**eTable 2C. Bivariate likelihood ratios for assessing sac residuals by MRA\***

|                                                    | <u><b>DSA:</b></u><br>No residual or<br>Neck residual | <u><b>DSA:</b></u><br>Sac<br>residual | <b>Likelihood Ratios</b> |
|----------------------------------------------------|-------------------------------------------------------|---------------------------------------|--------------------------|
| <u><b>MRA:</b></u> No residual<br>or Neck residual | p11                                                   | p21                                   | LRN = p21 / p11          |
| <u><b>MRA:</b></u> Sac residual                    | p12                                                   | p22                                   | LRP = p22 / p12          |
|                                                    | sum = 100%                                            | sum = 100%                            |                          |

\* In Tables B and C the probabilities "p" are estimated from 2x2 count data by meta-analysis. The bivariate likelihood ratios LRN and LRP are derived from these probabilities.

**eTable 3. Trivariate Likelihood Ratios and Conditional Probabilities**

The trivariate conditional probabilities are derived analogous to the bivariate conditional probabilities, which are described in eTable 2.

**eTable 3A. Estimation of trivariate post-test probabilities**

| Symbol               | Parameter name                   | Formula                                                                        |
|----------------------|----------------------------------|--------------------------------------------------------------------------------|
| LRN <sub>1</sub>     | negative likelihood ratio 1      | see table below                                                                |
| LRN <sub>2</sub>     | negative likelihood ratio 2      | see table below                                                                |
| LRP                  | positive likelihood ratio        | see table below                                                                |
| preP                 | pre-test probability             | can range from 0% to 100%                                                      |
| preOR                | pre-test odds ratio              | preOR = preP / (1 – preP)                                                      |
| NpostOR <sub>1</sub> | negative post-test odds ratio 1  | NpostOR <sub>1</sub> = preOR * LRN <sub>1</sub>                                |
| NpostOR <sub>2</sub> | negative post-test odds ratio 2  | NpostOR <sub>2</sub> = preOR * LRN <sub>2</sub>                                |
| PpostOR              | positive post-test odds ratio    | PpostOR = preOR * LRP                                                          |
| NpostP <sub>1</sub>  | negative post-test probability 1 | NpostP <sub>1</sub> = 1 – (NpostOR <sub>1</sub> / (1 + NpostOR <sub>1</sub> )) |
| NpostP <sub>2</sub>  | negative post-test probability 2 | NpostP <sub>2</sub> = 1 – (NpostOR <sub>2</sub> / (1 + NpostOR <sub>2</sub> )) |
| PpostP               | positive post-test probability   | PpostP = PpostOR / (1 + PpostOR)                                               |

**eTable 3B. Trivariate likelihood ratios for assessing sac residuals by MRA**

|                           | <u>DSA:</u><br>No residual or<br>Neck residual | <u>DSA:</u><br>Sac<br>residual | <i>Likelihood<br/>Ratios</i> |
|---------------------------|------------------------------------------------|--------------------------------|------------------------------|
| <u>MRA:</u> No residual   | p11                                            | p21                            | LRN <sub>1</sub> = p21 / p11 |
| <u>MRA:</u> Neck residual | p12                                            | p22                            | LRN <sub>2</sub> = p22 / p12 |
| <u>MRA:</u> Sac residual  | p13                                            | p23                            | LRP = p23 / p13              |
|                           | sum = 100%                                     | sum = 100%                     |                              |

The 3×3 count data of the primary studies are reduced to 2×3 count data, as shown. The probabilities "p" are estimated from the 2×3 count data by meta-analysis. The trivariate likelihood ratios are derived from these probabilities.

**eTable 4. Characteristics of Included Studies**

**eTable 4A. Study Design**

| Ref. | Authors, year     | Prospective study design | Consecutive patients | Study period from-to, month/year | Study duration, months | Time from coiling to follow-up, mean or *median (range), months | Delay between DSA and MRA, mean (max), days |
|------|-------------------|--------------------------|----------------------|----------------------------------|------------------------|-----------------------------------------------------------------|---------------------------------------------|
| e1   | Anzalone, 2000    | NA                       | NA                   | NA                               | NA                     | 10* (0-36)                                                      | NA (2)                                      |
| e2   | Boulin, 2001      | Yes                      | Yes                  | 11/98-06/99                      | 8                      | 12* (3->24))                                                    | 1 (1)                                       |
| e3   | Michardiere, 2001 | Yes                      | NA                   | 01/95-08/99                      | 56                     | 17 (2-60)                                                       | 16 (NA)                                     |
| e4   | Cottier, 2003     | Yes                      | NA                   | NA                               | NA                     | 12* (3-48)                                                      | NA (7)                                      |
| e5   | Okahara, 2004     | Yes                      | Yes                  | 02/00-05/02                      | 27                     | 6 (0-24)                                                        | NA (5)                                      |
| e6   | Yamada, 2004      | No                       | Yes                  | 02/02-10/03                      | 20                     | 9 (5-41)                                                        | NA (7)                                      |
| e7   | Farb, 2005        | NA                       | NA                   | NA                               | 18                     | 6* (0-18)                                                       | 11 (58)                                     |
| e8   | Majoie, 2005      | Yes                      | Yes                  | 11/03-07/04                      | 9                      | 6 (4-14)                                                        | 0-1 (1)                                     |
| e9   | Westerlaan, 2005  | No                       | Yes                  | 01/98-01/02                      | 49                     | 3* (3-18)                                                       | NA (3)                                      |
| e10  | Pierot, 2006      | Yes                      | Yes                  | NA                               | NA                     | 12* (12->36)                                                    | NA (2)                                      |
| e11  | Deutschmann, 2007 | No                       | Yes                  | 10/00-11/02                      | 26                     | NA (0-59)                                                       | NA (2)                                      |
| e12  | Wong, 2007        | Yes                      | Yes                  | 10/03-09/06                      | 36                     | 11 (0-66)                                                       | 22 (114)                                    |
| e13  | Gauvrit, 2008     | No                       | Yes                  | 01/98-08/01                      | 44                     | 13 (5-25)                                                       | 5 (NA)                                      |
| e14  | Lubicz, 2008      | No                       | Yes                  | 05/06-05/07                      | 13                     | 12* (6-12)                                                      | NA (10)                                     |
| e15  | Ramgren, 2008     | Yes                      | Yes                  | 03/04-04/05                      | 14                     | 27* (3-84)                                                      | 0-1 (39)                                    |
| e16  | Urbach, 2008      | Yes                      | Yes                  | NA                               | NA                     | 14 (0-24)                                                       | NA (NA)                                     |
| e17  | Wikstrom, 2008    | Yes                      | No                   | NA                               | NA                     | 14* (5-87)                                                      | 0 (0)                                       |
| e18  | Buhk, 2009        | Yes                      | Yes                  | 11/05-02/07                      | 16                     | 6 (6-6)                                                         | 0-1 (1)                                     |
| e19  | Ferre, 2009       | Yes                      | Yes                  | 04/04-11/06                      | 31                     | 8 (2-54)                                                        | NA (2)                                      |
| e20  | Kau, 2009         | No                       | Yes                  | 12/06-02/08                      | 15                     | 12* (3-19)                                                      | NA (8)                                      |
| e21  | Bakker, 2010      | Yes                      | Yes                  | 04/04-03/09                      | 60                     | 3 (3-3)                                                         | 0 (0)                                       |
| e22  | Kaufmann, 2010    | Yes                      | Yes                  | NA                               | 36                     | 12 (5-72)                                                       | 1* (8)                                      |
| e23  | Schaafsma, 2010   | Yes                      | Yes                  | 05/05-11/07                      | 31                     | 6 (3-18)                                                        | 0 (0)                                       |
| e24  | Nakiri, 2011      | Yes                      | Yes                  | 11/09-05/10                      | 7                      | NA (6-36)                                                       | 0-1 (1)                                     |
| e25  | Lavoie, 2012      | Yes                      | Yes#                 | 10/05-05/07                      | 19                     | 12* (6->20)                                                     | 0 (0)                                       |
| e26  | Pierot, 2012      | Yes                      | Yes                  | 04/06-09/08                      | 30                     | 12* (3-215)                                                     | 0-1 (1)                                     |
| e27  | Pierot, 2012      | Yes                      | Yes                  | 04/06-09/08                      | 30                     | 12* (3-215)                                                     | 0-1 (1)                                     |

\* median

# with random selection

MRA, magnetic resonance angiography

NA, not available

**eTable 4B. Patients and Coiled Aneurysms**

| Ref. | Authors, year            | MRA sequence (and field strength in Tesla) | Patients                               |                                                                 |                        |                                     | MRA and aneurysms                   |                                                      |                                                        |
|------|--------------------------|--------------------------------------------|----------------------------------------|-----------------------------------------------------------------|------------------------|-------------------------------------|-------------------------------------|------------------------------------------------------|--------------------------------------------------------|
|      |                          |                                            | Patients excluded from study, <i>n</i> | Patients (and coiled aneurysms) included in study, <i>n (n)</i> | Percentage of women, % | Age, mean or *median (range), years | Patients with ruptured aneurysms, % | Aneurysms (and MRA) excluded from analysis, <i>n</i> | Aneurysms (and MRA) included in the analysis, <i>n</i> |
| e1   | Anzalone et al., 2000    | TOF-MRA (1.5)                              | 0                                      | 49 (50)                                                         | 69                     | 53 (NA)                             | NA                                  | 7 (7)                                                | 57 (56)                                                |
| e1   | Anzalone et al., 2000    | ceTOF-MRA (1.5)                            | 25                                     | 24 (25)                                                         | 69                     | 53 (NA)                             | NA                                  | 4 (4)                                                | 21 (20)                                                |
| e2   | Boulin et al., 2001      | ceTOF-MRA (1.5)                            | 2                                      | 66 (70)                                                         | 55                     | 45 (NA)                             | 79                                  | 1 (1)                                                | 80 (80)                                                |
| e3   | Michardiere et al., 2001 | TOF-MRA (1.5)                              | 0                                      | 20 (22)                                                         | 65                     | 48 (37–69)                          | 90                                  | 0 (0)                                                | 25 (23)                                                |
| e4   | Cottier et al., 2003     | TOF-MRA (1.5)                              | 0                                      | 58 (71)                                                         | 81                     | 52 (NA)                             | 84                                  | 1 (1)                                                | 70 (57)                                                |
| e4   | Cottier et al., 2003     | ceTOF-MRA (1.5)                            | 0                                      | 58 (71)                                                         | 81                     | 52 (NA)                             | 84                                  | 1 (1)                                                | 70 (57)                                                |
| e5   | Okahara et al., 2004     | TOF-MRA (1.5)                              | 0                                      | 33 (33)                                                         | 70                     | 63 (31–84)                          | 67                                  | 3 (3)                                                | 30 (30)                                                |
| e6   | Yamada et al., 2004      | TOF-MRA (1.5)                              | 31                                     | 39 (39)                                                         | 77                     | 59 (39–76)                          | 5                                   | 0 (0)                                                | 51 (51)                                                |
| e7   | Farb et al., 2005        | TOF-MRA (1.5)                              | 0                                      | 28 (29)                                                         | 57                     | 47 (21–66)                          | NA                                  | 4 (4)                                                | 32 (30)                                                |
| e7   | Farb et al., 2005        | CE-MRA (1.5)                               | 0                                      | 28 (29)                                                         | 57                     | 47 (21–66)                          | NA                                  | 0 (0)                                                | 36 (34)                                                |
| e8   | Majoie et al., 2005      | TOF-MRA (3.0)                              | 0                                      | 20 (21)                                                         | 55                     | 49 (18–74)                          | 100                                 | 0 (0)                                                | 21 (20)                                                |
| e8   | Majoie et al., 2005      | ceTOF-MRA (3.0)                            | 0                                      | 20 (21)                                                         | 55                     | 49 (18–74)                          | 100                                 | 0 (0)                                                | 21 (20)                                                |
| e9   | Westerlaan et al., 2005  | TOF-MRA (1.5)                              | 4                                      | 27 (33)                                                         | 87                     | 52 (29–75)                          | 84                                  | 2 (0)                                                | 31 (27)                                                |
| e10  | Pierot et al., 2006      | TOF-MRA (1.5)                              | 0                                      | 32 (42)                                                         | 84                     | 48* (25–73)                         | 100                                 | 0 (0)                                                | 42 (32)                                                |
| e10  | Pierot et al., 2006      | CE-MRA (1.5)                               | 0                                      | 32 (42)                                                         | 84                     | 48* (25–73)                         | 100                                 | 0 (0)                                                | 42 (32)                                                |
| e11  | Deutschmann et al., 2007 | (ce)TOF-MRA (1.5)                          | 0                                      | 127 (136)                                                       | 70                     | 50 (13–74)                          | NA                                  | 13 (13)                                              | 188 (188)                                              |
| e12  | Wong et al., 2007        | TOF-MRA (1.5)                              | 0                                      | 37 (42)                                                         | 92                     | 54 (34–79)                          | 51                                  | 0 (0)                                                | 44 (39)                                                |
| e13  | Gauvrit et al., 2008     | CE-MRA (1.5)                               | 63                                     | 107 (107)                                                       | 54                     | 46* (14–77)                         | 85                                  | 15 (15)                                              | 92 (92)                                                |
| e14  | Lubicz et al., 2008      | CE-MRA (1.5)                               | 0                                      | 55 (67)                                                         | 67                     | 46 (17–65)                          | 46                                  | 0 (0)                                                | 67 (55)                                                |
| e15  | Ramgren et al., 2008     | TOF-MRA (1.5)                              | 0                                      | 37 (41)                                                         | 59                     | 51* (24–69)                         | 95                                  | 0 (0)                                                | 41 (37)                                                |
| e15  | Ramgren et al., 2008     | TOF-MRA (3.0)                              | 0                                      | 37 (41)                                                         | 59                     | 51* (24–69)                         | 95                                  | 0 (0)                                                | 41 (37)                                                |
| e15  | Ramgren et al., 2008     | CE-MRA (3.0)                               | 0                                      | 37 (41)                                                         | 59                     | 51* (24–69)                         | 95                                  | 3 (0)                                                | 38 (34)                                                |
| e16  | Urbach et al., 2008      | TOF-MRA (3.0)                              | 0                                      | 50 (50)                                                         | 68                     | 47 (8–74)                           | 100                                 | 0 (0)                                                | 50 (50)                                                |
| e17  | Wikstrom et al., 2008    | TOF-MRA (1.5)                              | 0                                      | 38 (45)                                                         | NA                     | NA (NA)                             | NA                                  | 0 (0)                                                | 47 (39)                                                |
| e17  | Wikstrom et al., 2008    | ceTOF-MRA (1.5)                            | 0                                      | 38 (45)                                                         | NA                     | NA (NA)                             | NA                                  | 0 (0)                                                | 47 (39)                                                |
| e17  | Wikstrom et al., 2008    | CE-MRA (1.5)                               | 0                                      | 38 (45)                                                         | NA                     | NA (NA)                             | NA                                  | 0 (0)                                                | 47 (39)                                                |
| e18  | Buhk et al., 2009        | TOF-MRA (3.0)                              | 0                                      | 22 (22)                                                         | 36                     | 48* (29–78)                         | NA                                  | 1 (1)                                                | 21 (21)                                                |
| e19  | Ferre et al., 2009       | TOF-MRA (3.0)                              | 0                                      | 51 (51)                                                         | 49                     | 51* (19–72)                         | 100                                 | 1 (0)                                                | 50 (50)                                                |
| e20  | Kau et al., 2009         | TOF-MRA (1.5)                              | 0                                      | 32 (37)                                                         | 59                     | 52 (26–90)                          | 78                                  | 0 (0)                                                | 37 (37)                                                |
| e20  | Kau et al., 2009         | CE-MRA (1.5)                               | 0                                      | 32 (37)                                                         | 59                     | 52 (26–90)                          | 78                                  | 0 (0)                                                | 37 (37)                                                |

|     |                        |                      |     |           |    |             |    |        |           |
|-----|------------------------|----------------------|-----|-----------|----|-------------|----|--------|-----------|
| e21 | Bakker et al., 2010    | TOF-MRA (1.5)        | 49  | 141 (141) | 67 | 54* (14–84) | 86 | 0 (0)  | 141 (141) |
| e22 | Kaufmann et al., 2010  | TOF-MRA (1.5)        | 0   | 58 (63)   | 78 | 59 (38–77)  | NA | 0 (0)  | 63 (58)   |
| e22 | Kaufmann et al., 2010  | TOF-MRA (3.0)        | 0   | 58 (63)   | 78 | 59 (38–77)  | NA | 0 (0)  | 63 (58)   |
| e22 | Kaufmann et al., 2010  | CE-MRA (1.5)         | 1   | 57 (62)   | 78 | 59 (38–77)  | NA | 0 (0)  | 62 (57)   |
| e22 | Kaufmann et al., 2010  | CE-MRA (3.0)         | 1   | 57 (62)   | 78 | 59 (38–77)  | NA | 0 (0)  | 62 (57)   |
| e23 | Schaafsma et al., 2010 | TOF+CE-MRA (1.5+3.0) | 106 | 311 (343) | 70 | 51 (19–79)  | 85 | 5 (5)  | 381 (346) |
| e24 | Nakiri et al., 2011    | TOF-MRA (3.0)        | 0   | 30 (43)   | 77 | 55 (27–74)  | NA | 0 (0)  | 43 (30)   |
| e24 | Nakiri et al., 2011    | CE-MRA (3.0)         | 0   | 30 (43)   | 77 | 55 (27–74)  | NA | 0 (0)  | 43 (30)   |
| e25 | Lavoie et al., 2012    | TOF+CE-MRA (1.5)     | 125 | 149 (160) | 72 | 53* (26–83) | 62 | 0 (0)  | 167 (156) |
| e26 | Pierot et al., 2012    | TOF-MRA (3.0)        | 4   | 96 (125)  | 59 | 51 (25–75)  | 77 | 10 (0) | 126 (104) |
| e26 | Pierot et al., 2012    | CE-MRA (3.0)         | 4   | 96 (125)  | 59 | 51 (25–75)  | 77 | 10 (0) | 126 (104) |
| e27 | Pierot et al., 2012    | TOF-MRA (1.5)        | 4   | 96 (125)  | 59 | 51 (25–75)  | 77 | 10 (0) | 126 (104) |

\* median



**eTable 4C. Index Test (MRA)**

| Ref. | Authors, year            | MRA<br>sequence<br>(and field<br>strength<br>in Tesla) | Sequence parameters |             |                          |                           |                            |                           |              |                                |                         |                               |                                                 |
|------|--------------------------|--------------------------------------------------------|---------------------|-------------|--------------------------|---------------------------|----------------------------|---------------------------|--------------|--------------------------------|-------------------------|-------------------------------|-------------------------------------------------|
|      |                          |                                                        | TR,<br>msec         | TE,<br>msec | Flip<br>angle,<br>degree | Matrix<br>size,<br>pixels | Field<br>of view,<br>mm×mm | Slice<br>orien-<br>tation | Slices,<br>n | Slice<br>thick-<br>ness,<br>mm | Slice<br>overlap,<br>mm | Slab<br>thick-<br>ness,<br>mm | Acquired<br>voxel<br>volume,<br>mm <sup>3</sup> |
| e1   | Anzalone et al., 2000    | TOF-MRA (1.5)                                          | 39–43               | 6.2–8.0     | 20                       | 230×512 or<br>192×512     | 200×230 or<br>150×200      | axial                     | NA           | 0.9                            | 0.0                     | NA                            | 0.34 or<br>0.27                                 |
| e1   | Anzalone et al., 2000    | ceTOF-MRA (1.5)                                        | 39–43               | 6.2–8.0     | 20                       | 230×512 or<br>192×512     | 200×230 or<br>150×200      | axial                     | NA           | 0.9                            | 0.0                     | NA                            | 0.34 or<br>0.27                                 |
| e2   | Boulin et al., 2001      | ceTOF-MRA (1.5)                                        | 26                  | 2.4         | 30                       | 256×512                   | 180×240                    | axial                     | 60           | 1.0                            | 0.0                     | 60                            | 0.33                                            |
| e3   | Michardiere et al., 2001 | TOF-MRA (1.5)                                          | 37                  | 6.5         | 20                       | 192×512                   | 200×200                    | axial                     | 62           | 1.2                            | 0.0                     | 74                            | 0.49                                            |
| e4   | Cottier et al., 2003     | TOF-MRA (1.5)                                          | 38                  | 6.9         | 30                       | 224×512                   | 220×220                    | axial                     | 46           | 1.2                            | 0.0                     | 55                            | 0.51                                            |
| e4   | Cottier et al., 2003     | ceTOF-MRA (1.5)                                        | 38                  | 6.9         | 30                       | 224×512                   | 220×220                    | axial                     | 46           | 1.2                            | 0.0                     | 55                            | 0.51                                            |
| e5   | Okahara et al., 2004     | TOF-MRA (1.5)                                          | 40                  | 6.8         | 20                       | 160×256                   | 160×160                    | axial                     | NA           | 1.2                            | 0.0                     | NA                            | 0.75                                            |
| e6   | Yamada et al., 2004      | TOF-MRA (1.5)                                          | 35                  | 1.5–1.6     | 25                       | 256×256                   | 150×150                    | axial                     | 60           | 0.6                            | 0.0                     | 36                            | 0.22                                            |
| e7   | Farb et al., 2005        | TOF-MRA (1.5)                                          | 33.3                | 3.0         | 30                       | 256×192                   | 220×165                    | axial                     | 120          | 1.0                            | 0.0                     | 120                           | 0.81                                            |
| e7   | Farb et al., 2005        | CE-MRA (1.5)                                           | 6.2                 | 1.7         | 30                       | 320×320                   | 220×165                    | coronal                   | 76           | 1.0                            | 0.0                     | 76                            | 0.35                                            |
| e8   | Majoie et al., 2005      | TOF-MRA (3.0)                                          | 21                  | 4           | 20                       | 512×512                   | 170×200                    | axial                     | 160          | 1.0                            | NA                      | 160                           | 0.24                                            |
| e8   | Majoie et al., 2005      | ceTOF-MRA (3.0)                                        | 21                  | 4           | 20                       | 512×512                   | 170×200                    | axial                     | 160          | 1.0                            | NA                      | 160                           | 0.24                                            |
| e9   | Westerlaan et al., 2005  | TOF-MRA (1.5)                                          | 35                  | 6.4         | 20                       | 160×512                   | 220×220                    | axial                     | 24           | 1.5                            | 0.0                     | 36                            | 0.89                                            |
| e10  | Pierot et al., 2006      | TOF-MRA (1.5)                                          | 35                  | 3.4         | 20                       | 320×224                   | 220×220                    | axial                     | NA           | 1.4                            | NA                      | NA                            | 0.95                                            |
| e10  | Pierot et al., 2006      | CE-MRA (1.5)                                           | 6.6                 | 1.5         | 35                       | 320×224                   | 220×220                    | coronal                   | NA           | 1.4                            | 0.0                     | NA                            | 0.95                                            |
| e11  | Deutschmann et al., 2007 | TOF-MRA (1.5)                                          | 28                  | 6           | 20                       | 400×250                   | 200×200                    | axial                     | 160          | 0.9                            | 0.0                     | 144                           | 0.36                                            |
| e11  | Deutschmann et al., 2007 | ceTOF-MRA (1.5)                                        | 28                  | 6           | 20                       | 400×250                   | 200×200                    | axial                     | 160          | 0.9                            | 0.0                     | 144                           | 0.36                                            |
| e12  | Wong et al., 2007        | TOF-MRA (1.5)                                          | 35                  | 2.9         | 25                       | 256×256                   | 150×150                    | axial                     | NA           | 0.6                            | 0.0                     | NA                            | 0.21                                            |
| e13  | Gauvrit et al., 2008     | CE-MRA (1.5)                                           | 6.8                 | 2.3         | 35                       | 150×512                   | 250×250                    | coronal                   | 40           | 1.5                            | 0.0                     | 60                            | 1.2                                             |
| e14  | Lubicz et al., 2008      | CE-MRA (1.5)                                           | 4.2                 | 1.3         | 35                       | 212×352                   | 175×350                    | coronal                   | 85           | 1.6                            | 0.8                     | 68                            | 1.31                                            |
| e15  | Ramgren et al., 2008     | TOF-MRA (1.5)                                          | 25                  | 6.9         | 20                       | 496×496                   | 230×230                    | axial                     | 100          | 1.0                            | 0.5                     | 50                            | 0.21                                            |
| e15  | Ramgren et al., 2008     | TOF-MRA (3.0)                                          | 26                  | 3.5         | 20                       | 640×367                   | 250×250                    | axial                     | 100          | 1.0                            | 0.5                     | 50                            | 0.27                                            |
| e15  | Ramgren et al., 2008     | CE-MRA (3.0)                                           | 5.8                 | 2.0         | 30                       | 368×329                   | 250×250                    | coronal                   | 100          | 0.5                            | 0.0                     | 50                            | 0.52                                            |
| e16  | Urbach et al., 2008      | TOF-MRA (3.0)                                          | 25                  | 3.5         | 20                       | 528×269                   | 200×200                    | axial                     | 150          | 1                              | 0.0                     | 150                           | 0.28                                            |
| e17  | Wikstrom et al., 2008    | TOF-MRA (1.5)                                          | 35                  | 2.4         | 25                       | NA                        | NA                         | axial                     | NA           | NA                             | NA                      | NA                            | 0.56                                            |
| e17  | Wikstrom et al., 2008    | ceTOF-MRA (1.5)                                        | 35                  | 2.4         | 25                       | NA                        | NA                         | axial                     | NA           | NA                             | NA                      | NA                            | 0.56                                            |
| e17  | Wikstrom et al., 2008    | CE-MRA (1.5)                                           | 6.3                 | 2.2         | 35                       | NA                        | NA                         | coronal                   | NA           | NA                             | 0.0                     | NA                            | 0.81                                            |
| e18  | Buhk et al., 2009        | TOF-MRA (3.0)                                          | 28                  | 4.6         | 18                       | 448×282                   | 200×157                    | axial                     | 140          | 0.65                           | 0.0                     | 0.65                          | 0.17                                            |

|     |                               |               |     |      |    |         |         |         |     |      |      |      |      |
|-----|-------------------------------|---------------|-----|------|----|---------|---------|---------|-----|------|------|------|------|
| e19 | Ferre et al., 2009            | TOF-MRA (3.0) | 18  | 3.4  | 20 | 354×279 | 210×189 | axial   | 140 | 1.1  | 0.55 | 77   | 0.44 |
| e20 | Kau et al., 2009              | TOF-MRA (1.5) | 25  | 6.9  | 25 | 496×280 | 230×230 | axial   | 175 | 1.0  | 0.5  | 87.5 | 0.36 |
| e20 | Kau et al., 2009              | CE-MRA (1.5)  | 10  | 2.5  | 25 | 520×417 | 280×280 | coronal | 150 | 0.5  | 0.0  | 75   | 0.13 |
| e21 | Bakker et al., 2010           | TOF-MRA (1.5) | 38  | 5.1  | 25 | 384×640 | 230×256 | axial   | 72  | 0.8  | 0.0  | 60   | 0.19 |
| e22 | Kaufmann et al., 2010         | TOF-MRA (1.5) | 36  | 6.9  | 25 | 256×224 | 180×180 | axial   | 84  | 1.4  | 0.0  | 122  | 0.79 |
| e22 | Kaufmann et al., 2010         | TOF-MRA (3.0) | 38  | 3.4  | 25 | 512×256 | 180×180 | axial   | 84  | 1.4  | 0.0  | 122  | 0.35 |
| e22 | Kaufmann et al., 2010         | CE-MRA (1.5)  | 6.6 | 1.3  | 45 | 256×224 | 220×220 | coronal | 48  | 1.2  | 0.0  | 58   | 1.00 |
| e22 | Kaufmann et al., 2010         | CE-MRA (3.0)  | 8.6 | 1.5  | 40 | 416×224 | 220×220 | coronal | 48  | 1.2  | 0.0  | 58   | 0.62 |
| e23 | Schaafsma et al. (a-c)*, 2010 | TOF-MRA (1.5) | 25  | 6.9  | 20 | 496×496 | 200×200 | axial   | NA  | 1.0  | 0.5  | NA   | 0.28 |
| e23 | Schaafsma et al. (d)*, 2010   | TOF-MRA (1.5) | 35  | 4.7  | 20 | 496×496 | 200×200 | axial   | NA  | 1.0  | 0.5  | NA   | 0.28 |
| e23 | Schaafsma et al. (a-c)*, 2010 | TOF-MRA (3.0) | 20  | 4    | 20 | 512×512 | 200×170 | axial   | 220 | 1.0  | 0.5  | 110  | 0.24 |
| e23 | Schaafsma et al. (a-c)*, 2010 | CE-MRA (1.5)  | 6.2 | 1.9  | 30 | 400×400 | 210×180 | coronal | NA  | 0.90 | 0.45 | NA   | 0.32 |
| e23 | Schaafsma et al. (d)*, 2010   | CE-MRA (1.5)  | 6.2 | 1.9  | 30 | 400×400 | 210×180 | coronal | NA  | 0.90 | 0.45 | NA   | 0.32 |
| e23 | Schaafsma et al. (a-c)*, 2010 | CE-MRA (3.0)  | 5.3 | 1.7  | 30 | 368×368 | 250×200 | coronal | NA  | 0.50 | 0.0  | NA   | 0.52 |
| e24 | Nakiri et al., 2011           | TOF-MRA (3.0) | 25  | 3.5  | 20 | 528×270 | 200×200 | axial   | 177 | 1.1  | 0.6  | 96   | 0.31 |
| e24 | Nakiri et al., 2011           | CE-MRA (3.0)  | 5.6 | 2.1  | 27 | 244×244 | 220×220 | coronal | 220 | 1.2  | 0.6  | 130  | 0.97 |
| e25 | Lavoie et al., 2012           | TOF-MRA (1.5) | 23  | 7    | 25 | 204×256 | 165×210 | axial   | 176 | 0.7  | 0.18 | 90   | 0.45 |
| e25 | Lavoie et al., 2012           | CE-MRA (1.5)  | 3.2 | 1.2  | 30 | 187×384 | 150×192 | coronal | 96  | 1.0  | -0.2 | 60   | 0.48 |
| e26 | Pierot et al., 2012           | TOF-MRA (3.0) | 18  | 3.45 | 20 | 464×418 | 210×190 | axial   | 140 | 0.55 | 0.0  | 77   | 0.11 |
| e26 | Pierot et al., 2012           | CE-MRA (3.0)  | 5.4 | 1.96 | 30 | 480×408 | 210×180 | axial   | 110 | 0.50 | 0.0  | 55   | 0.10 |
| e27 | Pierot et al., 2012           | TOF-MRA (1.5) | 38  | 6.9  | 20 | 320×224 | 220×154 | axial   | 110 | 0.7  | 0.0  | 77   | 0.33 |

NA, not available

\* Multicenter study: (a) = Academic Medical Center Amsterdam; (b) = University Medical Center Leiden; (c) = University Medical Center Utrecht; (d) = Free University Medical Center Amsterdam.

**eTable 4C. Index Test (MRA), *continued***

| Ref. | Authors, year            | MRA<br>sequence<br>(and field<br>strength<br>in <i>Tesla</i> ) | Acquisition                   |                                             | Contrast medium |                    |                                   |                              | Image reading    |     |     |    |                            |
|------|--------------------------|----------------------------------------------------------------|-------------------------------|---------------------------------------------|-----------------|--------------------|-----------------------------------|------------------------------|------------------|-----|-----|----|----------------------------|
|      |                          |                                                                | Parallel<br>imaging<br>factor | Acqui-<br>sition<br>time,<br><i>min:sec</i> | Generic<br>name | Volume<br>injected | Injection<br>rate,<br><i>mL/s</i> | Method<br>of bolus<br>timing | Source<br>images | MPR | MIP | VR | Obsers<br>vers<br><i>n</i> |
| e1   | Anzalone et al., 2000    | TOF-MRA (1.5)                                                  | 1                             | NA                                          |                 |                    |                                   |                              | +                |     | +   |    | 1                          |
| e1   | Anzalone et al., 2000    | ceTOF-MRA (1.5)                                                | 1                             | NA                                          | gadopentetate   | 0.1 mmol/kg        | NA                                | NA                           | +                |     | +   |    | 1                          |
| e2   | Boulin et al., 2001      | ceTOF-MRA (1.5)                                                | 1                             | 5:23                                        | gadopentetate   | 0.2 mmol/kg        | NA                                | NA                           | +                |     | +   |    | 1                          |
| e3   | Michardiere et al., 2001 | TOF-MRA (1.5)                                                  | 1                             | 7:22                                        |                 |                    |                                   |                              | +                |     | +   |    | NA                         |
| e4   | Cottier et al., 2003     | TOF-MRA (1.5)                                                  | 1                             | 4:57                                        |                 |                    |                                   |                              | +                |     | +   |    | 2                          |
| e4   | Cottier et al., 2003     | ceTOF-MRA (1.5)                                                | 1                             | 4:57                                        | gadoterate      | 0.1 mmol/kg        | manual                            | none                         | +                |     | +   |    | 2                          |
| e5   | Okahara et al., 2004     | TOF-MRA (1.5)                                                  | 1                             | 10:02                                       |                 |                    |                                   |                              | +                |     | +   | +  | 2                          |
| e6   | Yamada et al., 2004      | TOF-MRA (1.5)                                                  | 1                             | 11:00                                       |                 |                    |                                   |                              | +                |     | +   |    | 1                          |
| e7   | Farb et al., 2005        | TOF-MRA (1.5)                                                  | 1                             | 8:30                                        |                 |                    |                                   |                              | +                |     | +   |    | 3                          |
| e7   | Farb et al., 2005        | CE-MRA (1.5)                                                   | 1                             | 2:00                                        | gadodiamide     | 30 mL              | 3.0                               | fluoroscopy                  | +                |     | +   |    | 3                          |
| e8   | Majoie et al., 2005      | TOF-MRA (3.0)                                                  | 1.5                           | 7:14                                        |                 |                    |                                   |                              | +                |     | +   |    | 2                          |
| e8   | Majoie et al., 2005      | ceTOF-MRA (3.0)                                                | 1.5                           | 7:14                                        | gadopentetate   | 0.2 mmol/kg        | NA                                | NA                           | +                |     | +   |    | 2                          |
| e9   | Westerlaan et al., 2005  | TOF-MRA (1.5)                                                  | 1                             | 6:44                                        |                 |                    |                                   |                              | +                |     | +   |    | 1                          |
| e10  | Pierot et al., 2006      | TOF-MRA (1.5)                                                  | 1                             | 6:00                                        |                 |                    |                                   |                              | +                |     | +   |    | 2                          |
| e10  | Pierot et al., 2006      | CE-MRA (1.5)                                                   | 1                             | 0:58                                        | gadoterate      | 10 mmol            | 2.0                               | fluoroscopy                  | +                |     | +   |    | 2                          |
| e11  | Deutschmann et al., 2007 | TOF-MRA (1.5)                                                  | 1                             | NA                                          |                 |                    |                                   |                              | +                |     | +   |    | 2                          |
| e11  | Deutschmann et al., 2007 | ceTOF-MRA (1.5)                                                | 1                             | NA                                          | gadodiamide     | 0.2 mmol/kg        | NA                                | NA                           | +                |     | +   |    | 2                          |
| e12  | Wong et al., 2007        | TOF-MRA (1.5)                                                  | 1                             | 9:08                                        |                 |                    |                                   |                              | +                |     | +   | +  | 2                          |
| e13  | Gauvrit et al., 2008     | CE-MRA (1.5)                                                   | 1                             | 0:40                                        | gadodiamide     | 0.2 mmol/kg        | 2.0                               | test bolus                   | +                |     | +   |    | 2                          |
| e14  | Lubicz et al., 2008      | CE-MRA (1.5)                                                   | 1                             | 0:49                                        | gadobenate      | 9 mmol             | 1.8                               | fluoroscopy                  | +                |     | +   |    | 2                          |
| e15  | Ramgren et al., 2008     | TOF-MRA (1.5)                                                  | 1.5                           | 7:38                                        |                 |                    |                                   |                              | +                | +   | +   | +  | 3                          |
| e15  | Ramgren et al., 2008     | TOF-MRA (3.0)                                                  | 2.0                           | 5:58                                        |                 |                    |                                   |                              | +                | +   | +   | +  | 3                          |
| e15  | Ramgren et al., 2008     | CE-MRA (3.0)                                                   | 1.4                           | 0:49                                        | gadopentetate   | 9 mmol             | 2.0                               | test bolus                   | +                | +   | +   | +  | 3                          |
| e16  | Urbach et al., 2008      | TOF-MRA (3.0)                                                  | 2.0                           | NA                                          |                 |                    |                                   |                              | +                |     | +   |    | 2                          |
| e17  | Wikstrom et al., 2008    | TOF-MRA (1.5)                                                  | 1                             | 5:00                                        |                 |                    |                                   |                              | +                | +   | +   | +  | 1                          |
| e17  | Wikstrom et al., 2008    | ceTOF-MRA (1.5)                                                | 1                             | 5:00                                        | gadodiamide     | 40 mL              | 2.0                               | fluoroscopy                  | +                | +   | +   | +  | 1                          |
| e17  | Wikstrom et al., 2008    | CE-MRA (1.5)                                                   | 1                             | 0:37                                        | gadodiamide     | 40 mL              | 2.0                               | fluoroscopy                  | +                | +   | +   | +  | 1                          |
| e18  | Buhk et al., 2009        | TOF-MRA (3.0)                                                  | 1                             | 5:12                                        |                 |                    |                                   |                              | +                |     | +   | +  | 3                          |
| e19  | Ferre et al., 2009       | TOF-MRA (3.0)                                                  | 2.0                           | 4:59                                        |                 |                    |                                   |                              | +                |     | +   | +  | 2                          |
| e20  | Kau et al., 2009         | TOF-MRA (1.5)                                                  | 2.0                           | 4:36                                        |                 |                    |                                   |                              | +                |     | +   |    | 2                          |
| e20  | Kau et al., 2009         | CE-MRA (1.5)                                                   | 2.0                           | 3:00                                        | gadofosveset    | 0.03 mmol/kg       | manual                            | fixed delay                  | +                |     | +   |    | 2                          |
| e21  | Bakker et al., 2010      | TOF-MRA (1.5)                                                  | 1                             | 5:30                                        |                 |                    |                                   |                              | +                |     | +   |    | 3                          |
| e22  | Kaufmann et al., 2010    | TOF-MRA (1.5)                                                  | 1                             | 11:27                                       |                 |                    |                                   |                              | +                | +   | +   |    | 2                          |

|     |                               |               |     |       |               |             |     |             |   |   |   |   |   |
|-----|-------------------------------|---------------|-----|-------|---------------|-------------|-----|-------------|---|---|---|---|---|
| e22 | Kaufmann et al., 2010         | TOF-MRA (3.0) | 1   | 12:06 |               |             |     |             | + | + | + |   | 2 |
| e22 | Kaufmann et al., 2010         | CE-MRA (1.5)  | 1   | 0:51  | gadodiamide   | 12.5 mmol   | 3.0 | test bolus  | + | + | + |   | 2 |
| e22 | Kaufmann et al., 2010         | CE-MRA (3.0)  | 1   | 0:51  | gadodiamide   | 12.5 mmol   | 3.0 | test bolus  | + | + | + |   | 2 |
| e23 | Schaafsma et al. (a-c)*, 2010 | TOF-MRA (1.5) | 2.0 | 6:00  |               |             |     |             | + |   | + | + | 2 |
| e23 | Schaafsma et al. (d)*, 2010   | TOF-MRA (1.5) | 2.0 | 6:00  |               |             |     |             | + |   | + | + | 2 |
| e23 | Schaafsma et al. (a-c)*, 2010 | TOF-MRA (3.0) | 1.5 | 7:00  |               |             |     |             | + |   | + | + | 2 |
| e23 | Schaafsma et al. (a-c)*, 2010 | CE-MRA (1.5)  | 2.5 | 0:43  | gadopentetate | 15 mmol     | 3.0 | test bolus  | + |   | + | + | 2 |
| e23 | Schaafsma et al. (d)*, 2010   | CE-MRA (1.5)  | 2.5 | 0:43  | gadopentetate | 15 mmol     | 3.0 | test bolus  | + |   | + | + | 2 |
| e23 | Schaafsma et al. (a-c)*, 2010 | CE-MRA (3.0)  | 2.0 | 0:36  | gadopentetate | 7.5 mmol    | 2.0 | test bolus  | + |   | + | + | 2 |
| e24 | Nakiri et al., 2011           | TOF-MRA (3.0) | 3.0 | 7:05  |               |             |     |             | + |   | + | + | 2 |
| e24 | Nakiri et al., 2011           | CE-MRA (3.0)  | 2.0 | NA    | gadobenate    | 0.1 mmol/kg | 2.0 | NA          | + |   | + | + | 2 |
| e25 | Lavoie et al., 2012           | TOF-MRA (1.5) | 1   | 4:00  |               |             |     |             | + | + | + | + | 1 |
| e25 | Lavoie et al., 2012           | CE-MRA (1.5)  | 1   | 0:40  | gadodiamide   | 0.2 mmol/kg | 2.0 | test bolus  | + | + | + | + | 1 |
| e26 | Pierot et al., 2012           | TOF-MRA (3.0) | 2.0 | 4:59  |               |             |     |             | + |   | + |   | 2 |
| e26 | Pierot et al., 2012           | CE-MRA (3.0)  | 2.0 | 0:52  | gadoterate    | 10 mmol     | NA  | fluoroscopy | + |   | + |   | 2 |
| e27 | Pierot et al., 2012           | TOF-MRA (1.5) | 2.0 | 6:09  |               |             |     |             | + |   | + |   | 2 |

NA, not available

Image types: MPR = multiplanar reformation; MIP = maximum intensity projection; VR = volume rendering

**eTable 4D. Reference Test (DSA)**

| Ref. | Authors, year            | Contrast medium |                       |                          | Catheter angiography          |               |           |
|------|--------------------------|-----------------|-----------------------|--------------------------|-------------------------------|---------------|-----------|
|      |                          | Generic name    | Iodine content, mg/mL | Volume per injection, mL | DSA projections               | 3D-RA applied | Observers |
| e1   | Anzalone et al., 2000    | NA              | NA                    | NA                       | NA                            | No            | 1         |
| e2   | Boulin et al., 2001      | iobitridol      | 300                   | 8–10                     | multiple views                | No            | 2         |
| e3   | Michardiere et al., 2001 | NA              | NA                    | NA                       | NA                            | No            | NA        |
| e4   | Cottier et al., 2003     | iobitridol      | NA                    | 8–10                     | selected views                | No            | 1         |
| e5   | Okahara et al., 2004     | iohexol         | 300                   | 15–20 total              | 3D-RA                         | Yes           | 2         |
| e6   | Yamada et al., 2004      | NA              | NA                    | NA                       | AP, L, W                      | No            | 1         |
| e7   | Farb et al., 2005        | iohexol         | 300                   | NA                       | AP, L                         | Yes           | 3         |
| e8   | Majoie et al., 2005      | iodixanol       | 320                   | 6–8                      | 3 views including W           | No            | 2         |
| e9   | Westerlaan et al., 2005  | iohexol         | 300                   | 8–12                     | standard and additional views | No            | 1         |
| e10  | Pierot et al., 2006      | iomeprol        | 300                   | 8                        | multiple views including W    | No            | 1         |
| e11  | Deutschmann et al., 2007 | iodixanol       | 270                   | 8                        | AP, L, O                      | No            | 1         |
| e12  | Wong et al., 2007        | NA              | NA                    | NA                       | multiple views including W    | Yes           | 2         |
| e13  | Gauvrit et al., 2008     | NA              | NA                    | NA                       | standard and additional views | No            | 1         |
| e14  | Lubicz et al., 2008      | iodixanol       | 320                   | 10                       | standard views                | Yes           | 2         |
| e15  | Ramgren et al., 2008     | iohexol         | 240                   | 8–9                      | AP, L, W                      | No            | 3         |
| e16  | Urbach et al., 2008      | iopamidol       | 300                   | 5–7                      | standard views and W          | No            | 2         |
| e17  | Wikstrom et al., 2008    | iohexol         | NA                    | NA                       | AP, L, O                      | No            | 1         |
| e18  | Buhk et al., 2009        | iopromide       | 300                   | DSA: 8<br>3D-RA: 17      | standard views                | Yes           | 3         |
| e19  | Ferre et al., 2009       | iobitridol      | 300                   | 8–10                     | AP, L, W                      | No            | 2         |
| e20  | Kau et al., 2009         | iodixanol       | 270                   | 5–6                      | multiple views including W    | No            | 1         |
| e21  | Bakker et al., 2010      | iodixanol       | 270                   | 8                        | AP, L, W                      | Yes           | 3         |
| e22  | Kaufmann et al., 2010    | iohexol         | 300                   | DSA: 8–10<br>3D-RA: 16   | multiple views                | Yes           | 2         |
| e23  | Schaafsma et al., 2010   | iodixanol       | 300                   | ≤8                       | standard views and W          | No            | 2         |
| e24  | Nakiri et al., 2011      | iobitridol      | 300                   | 8–10                     | AP, L, W                      | Yes           | 2         |
| e25  | Lavoie et al., 2012      | iodixanol       | 270                   | 8                        | AP, L, O, W                   | No            | 2         |
| e26  | Pierot et al., 2012      | iodixanol       | 320                   | 8–10                     | AP, L, W                      | No            | 2         |
| e27  | Pierot et al., 2012      | iodixanol       | 320                   | 8–10                     | AP, L, W                      | No            | 2         |

NA, not available

3D-RA, rotational angiography with three-dimensional tomographic reconstruction

DSA, digital subtraction angiography

DSA projections: AP = anterior-posterior; L = lateral; O = oblique; W = working view

## eTable 5. Reasons for Exclusion of Patients and Aneurysms from the Primary Studies

### eTable 5A. Exclusion of Patients from the Studies

| Ref. | Authors, year           | MRA sequence (and Field Strength in <i>Tesla</i> ) | Patients excluded | Reasons for exclusion of patients from the study                                                                                                                                                                                                                                                                                                                                                                                                                                                                 |
|------|-------------------------|----------------------------------------------------|-------------------|------------------------------------------------------------------------------------------------------------------------------------------------------------------------------------------------------------------------------------------------------------------------------------------------------------------------------------------------------------------------------------------------------------------------------------------------------------------------------------------------------------------|
| e1   | Anzalone et al., 2000   | ceTOF-MRA (1.5)                                    | 25                | 25 patients did not receive ceTOF-MRA, whereas 24 non-selected patients underwent ceTOF-MRA in addition to TOF-MRA                                                                                                                                                                                                                                                                                                                                                                                               |
| e2   | Boulin et al., 2001     | ceTOF-MRA (1.5)                                    | 2                 | 2 patients did not undergo MRA due to claustrophobia                                                                                                                                                                                                                                                                                                                                                                                                                                                             |
| e6   | Yamada et al., 2004     | TOF-MRA (1.5)                                      | 31                | 31 patients with their MRA not performed within 3 days after coiling (early phase) or within 7 days of follow-up DSA                                                                                                                                                                                                                                                                                                                                                                                             |
| e9   | Westerlaan et al., 2005 | TOF-MRA (1.5)                                      | 4                 | 3 patients underwent MRA but not DSA due to advanced age or complications during previous DSA<br>1 patient underwent MRA but DSA was aborted because of an adverse reaction to contrast medium                                                                                                                                                                                                                                                                                                                   |
| e13  | Gauvrit et al., 2008    | CE-MRA (1.5)                                       | 63                | 13 patients with failure of embolization<br>11 patients because of early death<br>10 patients refused to undergo DS angiography<br>10 patients had major early recurrence of aneurysmal disease leading to retreatment<br>8 patients refused the follow-up<br>5 patients had their follow-up at another center<br>4 patients were lost to follow-up<br>2 patients had contraindication for MR angiography                                                                                                        |
| e21  | Bakker et al., 2010     | TOF-MRA (1.5)                                      | 49                | 15 patients underwent MRA but not DSA due to severe disabilities, adverse reactions to contrast medium, or because they refused DSA<br>14 patients with symptomatic aneurysms did not receive DSA or MRA because of severe disabilities<br>10 patients with SAH did not receive DSA or MRA because they passed away within 3 months after coiling, all related to initial SAH<br>10 patients underwent DSA but not MRA due to claustrophobia, implants, previous neurosurgical clipping, or additional aneurysms |
| e22  | Kaufmann et al., 2010   | CE-MRA (1.5)                                       | 1                 | 1 patient could not undergo both follow-up conventional angiography and CE-MRA within 10 days                                                                                                                                                                                                                                                                                                                                                                                                                    |
| e22  | Kaufmann et al., 2010   | CE-MRA (3.0)                                       | 1                 | 1 patient could not undergo both follow-up conventional angiography and CE-MRA within 10 days                                                                                                                                                                                                                                                                                                                                                                                                                    |
| e23  | Schaafsma et al., 2010  | TOF-MRA, CE-MRA (1.5, 3.0)                         | 106               | 25 patients because of no informed consent<br>24 patients with neurosurgical clip<br>21 patients due to logistic problems<br>21 patients with reasons unknown<br>15 patients did not undergo MRA due to claustrophobia                                                                                                                                                                                                                                                                                           |
| e25  | Lavoie et al., 2012     | TOF-MRA, CE-MRA (1.5)                              | 125               | 108 patients randomly not included since the MRA could not be performed on the day of DSA for logistic reasons<br>8 patients with MRA source images lost<br>4 patients with with MRA cancelled due to agitation                                                                                                                                                                                                                                                                                                  |

|     |                     |                          |   |                                                                                                                                                                                                                                                                                                                           |
|-----|---------------------|--------------------------|---|---------------------------------------------------------------------------------------------------------------------------------------------------------------------------------------------------------------------------------------------------------------------------------------------------------------------------|
| e26 | Pierot et al., 2012 | TOF-MRA, CE-MRA<br>(3.0) | 4 | <ul style="list-style-type: none"> <li>3 patients with refusal to perform MRA</li> <li>1 patient with non-MRA compatible clip</li> <li>1 patient with aneurysm previously treated with clip</li> <li>1 patient treated by parent vessel occlusion</li> <li>2 patients treated with coiling and stent placement</li> </ul> |
| e27 | Pierot et al., 2012 | TOF-MRA (1.5, 3.0)       | 4 | <ul style="list-style-type: none"> <li>1 patient who refused gadolinium injection</li> <li>1 patient treated by parent vessel occlusion</li> <li>2 patients treated with coiling and stent placement</li> <li>1 patient in whom the 1.5 Tesla MRA images were not retrievable</li> </ul>                                  |

---

**eTable 5B. Exclusion of MRAs and Aneurysms from Analysis**

| Ref. | Authors, year            | MRA sequence (and Field Strength in <i>Tesla</i> ) | MRAs_(and aneurysms) excluded | Reasons for exclusion of MRAs and aneurysms from analysis                                                                                                                                                                                                                                                                   |
|------|--------------------------|----------------------------------------------------|-------------------------------|-----------------------------------------------------------------------------------------------------------------------------------------------------------------------------------------------------------------------------------------------------------------------------------------------------------------------------|
| e1   | Anzalone et al., 2000    | TOF-MRA (1.5)                                      | 7 (7)                         | 7 MRA with significant artifacts in association with the coils                                                                                                                                                                                                                                                              |
| e1   | Anzalone et al., 2000    | ceTOF-MRA (1.5)                                    | 4 (4)                         | 4 MRA with coil-related artifacts in aneurysms that were occluded at DSA                                                                                                                                                                                                                                                    |
| e2   | Boulin et al., 2001      | ceTOF-MRA (1.5)                                    | 1 (1)                         | 1 MRA with susceptibility artifacts from a nearby clipped aneurysm                                                                                                                                                                                                                                                          |
| e4   | Cottier et al., 2003     | TOF-MRA (1.5)                                      | 1 (1)                         | 1 MRA with artifacts due to a neurosurgical clip                                                                                                                                                                                                                                                                            |
| e4   | Cottier et al., 2003     | ceTOF-MRA (1.5)                                    | 1 (1)                         | 1 MRA with artifacts due to a neurosurgical clip                                                                                                                                                                                                                                                                            |
| e5   | Okahara et al., 2004     | TOF-MRA (1.5)                                      | 3 (3)                         | 3 MRA with susceptibility artifacts at the aneurysm's neck site                                                                                                                                                                                                                                                             |
| e7   | Farb et al., 2005        | TOF-MRA (1.5)                                      | 4 (4)                         | 4 MRA with imaging failures                                                                                                                                                                                                                                                                                                 |
| e9   | Westerlaan et al., 2005  | TOF-MRA (1.5)                                      | 0 (2)                         | 2 MRA (each with 3 aneurysms) were analyzed, but one aneurysm of each MRA was excluded because of susceptibility artifacts from nearby clipped aneurysms                                                                                                                                                                    |
| e11  | Deutschmann et al., 2007 | TOF-MRA, CE-MRA (1.5)                              | 13 (13)                       | 8 MRA with interval between DSA and MRA more than 3 days<br>1 MRA with susceptibility artifacts due to a ventricular shunt<br>1 MRA with susceptibility artifacts due to surgical clips<br>1 MRA of a giant aneurysm with flow artifacts due to turbulences<br>2 MRA due to motion artifacts in addition to other artifacts |
| e13  | Gauvrit et al., 2008     | CE-MRA (1.5)                                       | 15 (15)                       | 15 MRA with lack or failure of early or late contrast-enhancement                                                                                                                                                                                                                                                           |
| e15  | Ramgren et al., 2008     | CE-MRA (3.0)                                       | 3 (3)                         | 3 MRA were not evaluable because of bad contrast timing                                                                                                                                                                                                                                                                     |
| e18  | Buhk et al., 2009        | TOF-MRA (3.0)                                      | 1 (1)                         | 1 MRA because of clip-related artifacts                                                                                                                                                                                                                                                                                     |
| e19  | Ferre et al., 2009       | TOF-MRA (3.0)                                      | 1 (1)                         | 1 MRA because the corresponding DSA was not interpretable                                                                                                                                                                                                                                                                   |
| e23  | Schaafsma et al., 2010   | TOF-MRA, CE-MRA (1.5, 3.0)                         | 5 (5)                         | 1 MRA was discontinued and thus not interpretable<br>1 MRA was not interpretable<br>3 MRAs because the correlated DSA was not interpretable                                                                                                                                                                                 |
| e25  | Lavoie et al., 2012      | TOF-MRA (1.5)                                      | 8 (8)                         | 4 MRA with coil artifacts<br>4 MRA with aneurysms not included in the field of view                                                                                                                                                                                                                                         |
| e25  | Lavoie et al., 2012      | CE-MRA (1.5)                                       | 1 (1)                         | 1 MRA with aneurysm not included in the field of view                                                                                                                                                                                                                                                                       |
| e26  | Pierot et al., 2012      | TOF-MRA, CE-MRA (3.0)                              | 0 (10)                        | 9 MRA with multiple aneurysms were analyzed and 1 clipped aneurysm was excluded<br>1 MRA with multiple aneurysms were analyzed and 1 stented aneurysm was excluded                                                                                                                                                          |
| e27  | Pierot et al., 2012      | TOF-MRA (1.5, 3.0)                                 | 0 (10)                        | 9 MRA with multiple aneurysms were analyzed and 1 clipped aneurysm was excluded<br>1 MRA with multiple aneurysms were analyzed and 1 stented aneurysm was excluded                                                                                                                                                          |



**eTable 6. Bivariate Count Data of MRA versus DSA**

**eTable 6A. Bivariate Assessment of Any Residuals**

| Ref. | Authors, year            | MRA Sequence (and<br>Field Strength in <i>Tesla</i> ) | <i>DSA:</i><br>no residual                 |                                                        | <i>DSA:</i><br>neck or sac residual        |                                                        | sum,<br><i>n</i> | <i>Diagnosing Any Residuals:</i>       |                                        |
|------|--------------------------|-------------------------------------------------------|--------------------------------------------|--------------------------------------------------------|--------------------------------------------|--------------------------------------------------------|------------------|----------------------------------------|----------------------------------------|
|      |                          |                                                       | <i>MRA:</i><br>no<br>residual,<br><i>n</i> | <i>MRA:</i><br>neck<br>or sac<br>residual,<br><i>n</i> | <i>MRA:</i><br>no<br>residual,<br><i>n</i> | <i>MRA:</i><br>neck<br>or sac<br>residual,<br><i>n</i> |                  | Sensitivity,<br>mean<br>(95%-CI),<br>% | Specificity,<br>mean<br>(95%-CI),<br>% |
| e1   | Anzalone et al., 2000    | TOF-MRA (1.5)                                         | 38                                         | 1                                                      | 0                                          | 18                                                     | 57               | 100 (81.5–100)                         | 97.4 (86.5–99.9)                       |
| e1   | Anzalone et al., 2000    | ceTOF-MRA (1.5)                                       | 13                                         | 1                                                      | 0                                          | 7                                                      | 21               | 100 (59.0–100)                         | 92.9 (66.1–99.8)                       |
| e2   | Boulin et al., 2001      | ceTOF-MRA (1.5)                                       | 54                                         | 1                                                      | 7                                          | 18                                                     | 80               | 72.0 (50.6–87.9)                       | 98.2 (90.3–100)                        |
| e3   | Michardiere et al., 2001 | TOF-MRA (1.5)                                         | 9                                          | 0                                                      | 4                                          | 12                                                     | 25               | 75.0 (47.6–92.7)                       | 100 (66.4–100)                         |
| e4   | Cottier et al., 2003     | TOF-MRA (1.5)                                         | 34                                         | 0                                                      | 6                                          | 30                                                     | 70               | 83.3 (67.2–93.6)                       | 100 (89.7–100)                         |
| e4   | Cottier et al., 2003     | ceTOF-MRA (1.5)                                       | 34                                         | 0                                                      | 6                                          | 30                                                     | 70               | 83.3 (67.2–93.6)                       | 100 (89.7–100)                         |
| e5   | Okahara et al., 2004     | TOF-MRA (1.5)                                         | 10                                         | 0                                                      | 4                                          | 16                                                     | 30               | 80.0 (56.3–94.3)                       | 100 (69.2–100)                         |
| e6   | Yamada et al., 2004      | TOF-MRA (1.5)                                         | 13                                         | 13                                                     | 0                                          | 25                                                     | 51               | 100 (86.3–100)                         | 50.0 (29.9–70.1)                       |
| e7   | Farb et al., 2005        | TOF-MRA (1.5)                                         | 20                                         | 2                                                      | 6                                          | 4                                                      | 32               | 40.0 (12.2–73.8)                       | 90.9 (70.8–98.9)                       |
| e7   | Farb et al., 2005        | CE-MRA (1.5)                                          | 22                                         | 3                                                      | 2                                          | 9                                                      | 36               | 81.8 (48.2–97.7)                       | 88.0 (68.8–97.5)                       |
| e8   | Majoie et al., 2005      | TOF-MRA (3.0)                                         | 9                                          | 3                                                      | 0                                          | 9                                                      | 21               | 100 (66.4–100)                         | 75.0 (42.8–94.5)                       |
| e8   | Majoie et al., 2005      | ceTOF-MRA (3.0)                                       | 9                                          | 3                                                      | 0                                          | 9                                                      | 21               | 100 (66.4–100)                         | 75.0 (42.8–94.5)                       |
| e9   | Westerlaan et al., 2005  | TOF-MRA (1.5)                                         | 20                                         | 2                                                      | 1                                          | 8                                                      | 31               | 88.9 (51.8–99.7)                       | 90.9 (70.8–98.9)                       |
| e10  | Pierot et al., 2006 &    | TOF-MRA (1.5)                                         | 13                                         | 1                                                      | 5.5                                        | 22.5                                                   | 42               | 80.4 (61.1–92.8)                       | 92.9 (66.1–99.8)                       |
| e10  | Pierot et al., 2006 &    | CE-MRA (1.5)                                          | 12.5                                       | 1.5                                                    | 6                                          | 22                                                     | 42               | 78.6 (59.0–91.7)                       | 89.3 (61.5–99.2)                       |
| e11  | Deutschmann et al., 2007 | TOF-MRA (1.5)                                         | 118                                        | 9                                                      | 7                                          | 54                                                     | 188              | 88.5 (77.8–95.3)                       | 92.9 (87.0–96.7)                       |
| e12  | Wong et al., 2007        | TOF-MRA (1.5)                                         | 9                                          | 2                                                      | 0                                          | 33                                                     | 44               | 100 (89.4–100)                         | 81.8 (48.2–97.7)                       |
| e13  | Gauvrit et al., 2008     | CE-MRA (1.5)                                          | 60                                         | 0                                                      | 1                                          | 31                                                     | 92               | 96.9 (83.8–99.9)                       | 100 (94.0–100)                         |
| e14  | Lubicz et al., 2008 &    | CE-MRA (1.5)                                          | 50.5                                       | 2.5                                                    | 1                                          | 13                                                     | 67               | 92.9 (66.1–99.8)                       | 95.3 (85.7–99.2)                       |
| e15  | Ramgren et al., 2008     | TOF-MRA (1.5)                                         | 2                                          | 4                                                      | 4                                          | 31                                                     | 41               | 88.6 (73.3–96.8)                       | 33.3 (4.3–77.7)                        |
| e15  | Ramgren et al., 2008     | TOF-MRA (3.0)                                         | 4                                          | 2                                                      | 3                                          | 32                                                     | 41               | 91.4 (76.9–98.2)                       | 66.7 (22.3–95.7)                       |
| e15  | Ramgren et al., 2008     | CE-MRA (3.0)                                          | 2                                          | 3                                                      | 6                                          | 27                                                     | 38               | 81.8 (64.5–93.0)                       | 40.0 (5.3–85.3)                        |
| e16  | Urbach et al., 2008      | TOF-MRA (3.0)                                         | 36                                         | 3                                                      | 0                                          | 11                                                     | 50               | 100 (71.5–100)                         | 92.3 (79.1–98.4)                       |
| e17  | Wikstrom et al., 2008    | TOF-MRA (1.5)                                         | 18                                         | 7                                                      | 1                                          | 21                                                     | 47               | 95.5 (77.2–99.9)                       | 72.0 (50.6–87.9)                       |
| e17  | Wikstrom et al., 2008    | ceTOF-MRA (1.5)                                       | 17                                         | 8                                                      | 1                                          | 21                                                     | 47               | 95.5 (77.2–99.9)                       | 68.0 (46.5–85.1)                       |

|     |                             |                      |     |      |      |    |     |                  |                  |
|-----|-----------------------------|----------------------|-----|------|------|----|-----|------------------|------------------|
| e17 | Wikstrom et al., 2008       | CE-MRA (1.5)         | 19  | 6    | 4    | 18 | 47  | 81.8 (59.7–94.8) | 76.0 (54.9–90.6) |
| e18 | Buhk et al., 2009 §         | TOF-MRA (3.0)        | 11  | 2.67 | 0.33 | 7  | 21  | 95.5 (54.4–100)  | 80.5 (50.8–96.3) |
| e19 | Ferre et al., 2009          | TOF-MRA (3.0)        | 23  | 3    | 0    | 24 | 50  | 100 (85.8–100)   | 88.5 (69.8–97.6) |
| e20 | Kau et al., 2009            | TOF-MRA (1.5)        | 10  | 3    | 3    | 21 | 37  | 87.5 (67.6–97.3) | 76.9 (46.2–95.0) |
| e20 | Kau et al., 2009            | CE-MRA (1.5)         | 12  | 1    | 2    | 22 | 37  | 91.7 (73.0–99.0) | 92.3 (64.0–99.8) |
| e21 | Bakker et al., 2010         | TOF-MRA (1.5)        | 128 | 0    | 2    | 11 | 141 | 84.6 (54.6–98.1) | 100 (97.2–100)   |
| e22 | Kaufmann et al., 2010       | TOF-MRA (1.5)        | 12  | 11   | 4    | 36 | 63  | 90.0 (76.3–97.2) | 52.2 (30.6–73.2) |
| e22 | Kaufmann et al., 2010       | TOF-MRA (3.0)        | 12  | 11   | 5    | 35 | 63  | 87.5 (73.2–95.8) | 52.2 (30.6–73.2) |
| e22 | Kaufmann et al., 2010       | CE-MRA (1.5)         | 15  | 8    | 6    | 33 | 62  | 84.6 (69.5–94.1) | 65.2 (42.7–83.6) |
| e22 | Kaufmann et al., 2010       | CE-MRA (3.0)         | 14  | 8    | 4    | 36 | 62  | 90.0 (76.3–97.2) | 63.6 (40.7–82.8) |
| e23 | Schaafsma et al. (a)*, 2010 | TOF+CE-MRA (1.5+3.0) | 20  | 15   | 5    | 39 | 79  | 88.6 (75.4–96.2) | 57.1 (39.4–73.7) |
| e23 | Schaafsma et al. (b)*, 2010 | TOF+CE-MRA (1.5+3.0) | 27  | 13   | 2    | 35 | 77  | 94.6 (81.8–99.3) | 67.5 (50.9–81.4) |
| e23 | Schaafsma et al. (c)*, 2010 | TOF+CE-MRA (1.5+3.0) | 58  | 43   | 8    | 55 | 164 | 87.3 (76.5–94.4) | 57.4 (47.2–67.2) |
| e23 | Schaafsma et al. (d)*, 2010 | TOF+CE-MRA (1.5)     | 18  | 5    | 4    | 34 | 61  | 89.5 (75.2–97.1) | 78.3 (56.3–92.5) |
| e24 | Nakiri et al., 2011         | TOF-MRA (3.0)        | 23  | 0    | 1    | 19 | 43  | 95.0 (75.1–99.9) | 100 (85.2–100)   |
| e24 | Nakiri et al., 2011         | CE-MRA (3.0)         | 23  | 0    | 0    | 20 | 43  | 100 (83.2–100)   | 100 (85.2–100)   |
| e25 | Lavoie et al., 2012         | TOF-MRA (1.5)        | 50  | 12   | 21   | 76 | 159 | 78.4 (68.8–86.1) | 80.6 (68.6–89.6) |
| e25 | Lavoie et al., 2012         | CE-MRA (1.5)         | 53  | 14   | 12   | 87 | 166 | 87.9 (79.8–93.6) | 79.1 (67.4–88.1) |
| e26 | Pierot et al., 2012         | TOF-MRA (3.0)        | 47  | 10   | 18   | 51 | 126 | 73.9 (61.9–83.7) | 82.5 (70.1–91.3) |
| e26 | Pierot et al., 2012         | CE-MRA (3.0)         | 49  | 8    | 19   | 50 | 126 | 72.5 (60.4–82.5) | 86.0 (74.2–93.7) |
| e27 | Pierot et al., 2012         | TOF-MRA (1.5)        | 51  | 7    | 24   | 44 | 126 | 64.7 (52.2–75.9) | 87.9 (76.7–95.0) |

**Symbols:**

& Count data were averaged from 2 observers.

§ Count data were averaged from 3 observers.

\* Multicenter study: (a) = Academic Medical Center Amsterdam; (b) = University Medical Center Leiden; (c) = University Medical Center Utrecht; (d) = Free University Medical Center Amsterdam.

**Abbreviations:**

95%-CI, 95% confidence interval

DSA, digital subtraction angiography

MRA, magnetic resonance angiography:

TOF-MRA, time-of-flight MRA

ceTOF-MRA, contrast-enhanced TOF-MRA

CE-MRA, contrast-enhanced T1-weighted MRA

**eTable 6B. Bivariate Assessment of Sac Residuals**

| Ref. | Authors, year               | MRA Sequence (and Field Strength in Tesla) | DSA:<br>no or neck residual |                               | DSA:<br>sac residual |                               | sum,<br><i>n</i> | Diagnosing Sac Residuals:     |                               |
|------|-----------------------------|--------------------------------------------|-----------------------------|-------------------------------|----------------------|-------------------------------|------------------|-------------------------------|-------------------------------|
|      |                             |                                            | MRA:<br>no residual,        | MRA:<br>neck or sac residual, | MRA:<br>no residual, | MRA:<br>neck or sac residual, |                  | Sensitivity, mean (95%-CI), % | Specificity, mean (95%-CI), % |
|      |                             |                                            | <i>n</i>                    | <i>n</i>                      | <i>n</i>             | <i>n</i>                      |                  |                               |                               |
| e1   | Anzalone et al., 2000       | TOF-MRA (1.5)                              | 55                          | 0                             | 0                    | 2                             | 57               | 100 (15.8–100)                | 100 (93.5–100)                |
| e3   | Michardiere et al., 2001    | TOF-MRA (1.5)                              | 21                          | 0                             | 1                    | 3                             | 25               | 75.0 (19.4–99.4)              | 100 (83.9–100)                |
| e5   | Okahara et al., 2004        | TOF-MRA (1.5)                              | 27                          | 0                             | 0                    | 3                             | 30               | 100 (29.2–100)                | 100 (87.2–100)                |
| e6   | Yamada et al., 2004         | TOF-MRA (1.5)                              | 49                          | 1                             | 0                    | 1                             | 51               | 100 (2.5–100)                 | 98.0 (89.4–99.9)              |
| e9   | Westerlaan et al., 2005     | TOF-MRA (1.5)                              | 30                          | 1                             | 0                    | 0                             | 31               | ND                            | 96.8 (83.3–99.9)              |
| e10  | Pierot et al., 2006 &       | TOF-MRA (1.5)                              | 36.5                        | 0.5                           | 0.5                  | 4.5                           | 42               | 90.0 (37.1–100)               | 98.6 (88.1–100)               |
| e10  | Pierot et al., 2006 &       | CE-MRA (1.5)                               | 36.5                        | 0.5                           | 0.5                  | 4.5                           | 42               | 90.0 (37.1–100)               | 98.6 (88.1–100)               |
| e12  | Wong et al., 2007           | TOF-MRA (1.5)                              | 23                          | 2                             | 0                    | 19                            | 44               | 100 (82.4–100)                | 92.0 (74.0–99.0)              |
| e13  | Gauvrit et al., 2008        | CE-MRA (1.5)                               | 80                          | 0                             | 2                    | 10                            | 92               | 83.3 (51.6–97.9)              | 100 (95.5–100)                |
| e14  | Lubicz et al., 2008 &       | CE-MRA (1.5)                               | 60                          | 0                             | 1                    | 6                             | 67               | 85.7 (42.1–99.6)              | 100 (94.0–100)                |
| e15  | Ramgren et al., 2008        | TOF-MRA (1.5)                              | 28                          | 5                             | 3                    | 5                             | 41               | 62.5 (24.5–91.5)              | 84.8 (68.1–94.9)              |
| e15  | Ramgren et al., 2008        | TOF-MRA (3.0)                              | 33                          | 2                             | 2                    | 4                             | 41               | 66.7 (22.3–95.7)              | 94.3 (80.8–99.3)              |
| e15  | Ramgren et al., 2008        | CE-MRA (3.0)                               | 27                          | 4                             | 2                    | 5                             | 38               | 71.4 (29.0–96.3)              | 87.1 (70.2–96.4)              |
| e16  | Urbach et al., 2008         | TOF-MRA (3.0)                              | 41                          | 0                             | 0                    | 9                             | 50               | 100 (66.4–100)                | 100 (91.4–100)                |
| e18  | Buhk et al., 2009 §         | TOF-MRA (3.0)                              | 16.67                       | 0.33                          | 0                    | 4                             | 21               | 100 (39.8–100)                | 98.1 (77.2–100)               |
| e19  | Ferre et al., 2009          | TOF-MRA (3.0)                              | 44                          | 2                             | 0                    | 4                             | 50               | 100 (39.8–100)                | 95.7 (85.2–99.5)              |
| e20  | Kau et al., 2009            | TOF-MRA (1.5)                              | 23                          | 3                             | 2                    | 9                             | 37               | 81.8 (48.2–97.7)              | 88.5 (69.8–97.6)              |
| e20  | Kau et al., 2009            | CE-MRA (1.5)                               | 23                          | 3                             | 3                    | 8                             | 37               | 72.7 (39.0–94.0)              | 88.5 (69.8–97.6)              |
| e21  | Bakker et al., 2010         | TOF-MRA (1.5)                              | 136                         | 0                             | 0                    | 5                             | 141              | 100 (47.8–100)                | 100 (97.3–100)                |
| e22  | Kaufmann et al., 2010       | TOF-MRA (1.5)                              | 48                          | 7                             | 2                    | 6                             | 63               | 75.0 (34.9–96.8)              | 87.3 (75.5–94.7)              |
| e22  | Kaufmann et al., 2010       | TOF-MRA (3.0)                              | 45                          | 10                            | 2                    | 6                             | 63               | 75.0 (34.9–96.8)              | 81.8 (69.1–90.9)              |
| e22  | Kaufmann et al., 2010       | CE-MRA (1.5)                               | 43                          | 11                            | 1                    | 7                             | 62               | 87.5 (47.3–99.7)              | 79.6 (66.5–89.4)              |
| e22  | Kaufmann et al., 2010       | CE-MRA (3.0)                               | 45                          | 9                             | 1                    | 7                             | 62               | 87.5 (47.3–99.7)              | 83.3 (70.7–92.1)              |
| e23  | Schaafsma et al. (a)*, 2010 | TOF+CE-MRA (1.5+3.0)                       | 65                          | 1                             | 3                    | 10                            | 79               | 76.9 (46.2–95.0)              | 98.5 (91.8–100)               |
| e23  | Schaafsma et al. (b)*, 2010 | TOF+CE-MRA (1.5+3.0)                       | 47                          | 5                             | 5                    | 20                            | 77               | 80.0 (59.3–93.2)              | 90.4 (79.0–96.8)              |
| e23  | Schaafsma et al. (c)*, 2010 | TOF+CE-MRA (1.5+3.0)                       | 115                         | 16                            | 5                    | 28                            | 164              | 84.8 (68.1–94.9)              | 87.8 (80.9–92.9)              |
| e23  | Schaafsma et al. (d)*, 2010 | TOF+CE-MRA (1.5)                           | 34                          | 10                            | 3                    | 14                            | 61               | 82.4 (56.6–96.2)              | 77.3 (62.2–88.5)              |
| e24  | Nakiri et al., 2011         | TOF-MRA (3.0)                              | 29                          | 0                             | 0                    | 14                            | 43               | 100 (76.8–100)                | 100 (88.1–100)                |
| e24  | Nakiri et al., 2011         | CE-MRA (3.0)                               | 29                          | 0                             | 0                    | 14                            | 43               | 100 (76.8–100)                | 100 (88.1–100)                |
| e25  | Lavoie et al., 2012         | TOF-MRA (1.5)                              | 97                          | 17                            | 11                   | 34                            | 159              | 75.6 (60.5–87.1)              | 85.1 (77.2–91.1)              |

|     |                     |               |     |    |    |    |     |                  |                  |
|-----|---------------------|---------------|-----|----|----|----|-----|------------------|------------------|
| e25 | Lavoie et al., 2012 | CE-MRA (1.5)  | 103 | 18 | 9  | 36 | 166 | 80.0 (65.4–90.4) | 85.1 (77.5–90.9) |
| e26 | Pierot et al., 2012 | TOF-MRA (3.0) | 85  | 6  | 9  | 26 | 126 | 74.3 (56.7–87.5) | 93.4 (86.2–97.5) |
| e26 | Pierot et al., 2012 | CE-MRA (3.0)  | 83  | 8  | 7  | 28 | 126 | 80.0 (63.1–91.6) | 91.2 (83.4–96.1) |
| e27 | Pierot et al., 2012 | TOF-MRA (1.5) | 89  | 2  | 16 | 19 | 126 | 54.3 (36.6–71.2) | 97.8 (92.3–99.7) |

**Symbols:**

& Count data were averaged from 2 observers.

§ Count data were averaged from 3 observers.

\* Multicenter study: (a) = Academic Medical Center Amsterdam; (b) = University Medical Center Leiden; (c) = University Medical Center Utrecht; (d) = Free University Medical Center Amsterdam.

**Abbreviations:**

95%-CI, 95% confidence interval

DSA, digital subtraction angiography

MRA, magnetic resonance angiography:

TOF-MRA, time-of-flight MRA

ceTOF-MRA, contrast-enhanced TOF-MRA

CE-MRA, contrast-enhanced T1-weighted MRA

ND, not determined

**eTable 7. Trivariate Count Data of MRA versus DSA**

| Ref. | Authors, year                        | MRA Sequence (and Field Strength in <i>Tesla</i> ) | <i>DSA: no residual</i>    |                              |                             | <i>DSA: neck residual</i>  |                              |                             | <i>DSA: sac residual</i>   |                              |                             | sum,<br><i>n</i> |
|------|--------------------------------------|----------------------------------------------------|----------------------------|------------------------------|-----------------------------|----------------------------|------------------------------|-----------------------------|----------------------------|------------------------------|-----------------------------|------------------|
|      |                                      |                                                    | <i>MRA: no residual, n</i> | <i>MRA: neck residual, n</i> | <i>MRA: sac residual, n</i> | <i>MRA: no residual, n</i> | <i>MRA: neck residual, n</i> | <i>MRA: sac residual, n</i> | <i>MRA: no residual, n</i> | <i>MRA: neck residual, n</i> | <i>MRA: sac residual, n</i> |                  |
| e1   | Anzalone et al., 2000                | TOF-MRA (1.5)                                      | 38                         | 1                            | 0                           | 0                          | 16                           | 0                           | 0                          | 0                            | 2                           | 57               |
| e3   | Michardiere et al., 2001             | TOF-MRA (1.5)                                      | 9                          | 0                            | 0                           | 3                          | 9                            | 0                           | 1                          | 0                            | 3                           | 25               |
| e5   | Okahara et al., 2004                 | TOF-MRA (1.5)                                      | 10                         | 0                            | 0                           | 4                          | 13                           | 0                           | 0                          | 0                            | 3                           | 30               |
| e6   | Yamada et al., 2004                  | TOF-MRA (1.5)                                      | 13                         | 12                           | 1                           | 0                          | 24                           | 0                           | 0                          | 0                            | 1                           | 51               |
| e9   | Westerlaan et al., 2005              | TOF-MRA (1.5)                                      | 20                         | 1                            | 1                           | 1                          | 8                            | 0                           | 0                          | 0                            | 0                           | 31               |
| e10  | Pierot et al., 2006 <sup>&amp;</sup> | TOF-MRA (1.5)                                      | 13                         | 1                            | 0                           | 5.5                        | 17                           | 0.5                         | 0                          | 0.5                          | 4.5                         | 42               |
| e10  | Pierot et al., 2006 <sup>&amp;</sup> | CE-MRA (1.5)                                       | 12.5                       | 1.5                          | 0                           | 6                          | 16.5                         | 0.5                         | 0                          | 0.5                          | 4.5                         | 42               |
| e12  | Wong et al., 2007                    | TOF-MRA (1.5)                                      | 9                          | 2                            | 0                           | 0                          | 12                           | 2                           | 0                          | 0                            | 19                          | 44               |
| e13  | Gauvrit et al., 2008                 | CE-MRA (1.5)                                       | 60                         | 0                            | 0                           | 1                          | 19                           | 0                           | 0                          | 2                            | 10                          | 92               |
| e14  | Lubicz et al., 2008 <sup>&amp;</sup> | CE-MRA (1.5)                                       | 50.5                       | 2.5                          | 0                           | 0                          | 7                            | 0                           | 1                          | 0                            | 6                           | 67               |
| e15  | Ramgren et al., 2008                 | TOF-MRA (1.5)                                      | 2                          | 4                            | 0                           | 3                          | 19                           | 5                           | 1                          | 2                            | 5                           | 41               |
| e15  | Ramgren et al., 2008                 | TOF-MRA (3.0)                                      | 4                          | 2                            | 0                           | 2                          | 25                           | 2                           | 1                          | 1                            | 4                           | 41               |
| e15  | Ramgren et al., 2008                 | CE-MRA (3.0)                                       | 2                          | 3                            | 0                           | 5                          | 17                           | 4                           | 1                          | 1                            | 5                           | 38               |
| e16  | Urbach et al., 2008                  | TOF-MRA (3.0)                                      | 36                         | 3                            | 0                           | 0                          | 2                            | 0                           | 0                          | 0                            | 9                           | 50               |
| e18  | Buhk et al., 2009 <sup>§</sup>       | TOF-MRA (3.0)                                      | 11                         | 2.67                         | 0                           | 0.33                       | 2.67                         | 0.33                        | 0                          | 0                            | 4                           | 21               |
| e19  | Ferre et al., 2009                   | TOF-MRA (3.0)                                      | 23                         | 2                            | 1                           | 0                          | 19                           | 1                           | 0                          | 0                            | 4                           | 50               |
| e20  | Kau et al., 2009                     | TOF-MRA (1.5)                                      | 10                         | 3                            | 0                           | 3                          | 7                            | 3                           | 0                          | 2                            | 9                           | 37               |
| e20  | Kau et al., 2009                     | CE-MRA (1.5)                                       | 12                         | 1                            | 0                           | 2                          | 8                            | 3                           | 0                          | 3                            | 8                           | 37               |
| e21  | Bakker et al., 2010                  | TOF-MRA (1.5)                                      | 128                        | 0                            | 0                           | 2                          | 6                            | 0                           | 0                          | 0                            | 5                           | 141              |
| e22  | Kaufmann et al., 2010                | TOF-MRA (1.5)                                      | 12                         | 8                            | 3                           | 4                          | 24                           | 4                           | 0                          | 2                            | 6                           | 63               |
| e22  | Kaufmann et al., 2010                | CE-MRA (1.5)                                       | 15                         | 4                            | 4                           | 6                          | 18                           | 7                           | 0                          | 1                            | 7                           | 62               |
| e22  | Kaufmann et al., 2010                | TOF-MRA (3.0)                                      | 12                         | 6                            | 5                           | 5                          | 22                           | 5                           | 0                          | 2                            | 6                           | 63               |
| e22  | Kaufmann et al., 2010                | CE-MRA (3.0)                                       | 14                         | 5                            | 3                           | 4                          | 22                           | 6                           | 0                          | 1                            | 7                           | 62               |
| e23  | Schaafsma et al. (a)*,2010           | TOF+CE-MRA (1.5+3.0)                               | 20                         | 15                           | 0                           | 5                          | 25                           | 1                           | 0                          | 3                            | 10                          | 79               |
| e23  | Schaafsma et al. (b)*,2010           | TOF+CE-MRA (1.5+3.0)                               | 27                         | 11                           | 2                           | 2                          | 7                            | 3                           | 0                          | 5                            | 20                          | 77               |
| e23  | Schaafsma et al. (c)*,2010           | TOF+CE-MRA (1.5+3.0)                               | 58                         | 34                           | 9                           | 7                          | 16                           | 7                           | 1                          | 4                            | 28                          | 164              |
| e23  | Schaafsma et al. (d)*,2010           | TOF+CE-MRA (1.5)                                   | 18                         | 4                            | 1                           | 4                          | 8                            | 9                           | 0                          | 3                            | 14                          | 61               |
| e24  | Nakiri et al., 2011                  | TOF-MRA (3.0)                                      | 23                         | 0                            | 0                           | 1                          | 5                            | 0                           | 0                          | 0                            | 14                          | 43               |
| e24  | Nakiri et al., 2011                  | CE-MRA (3.0)                                       | 23                         | 0                            | 0                           | 0                          | 6                            | 0                           | 0                          | 0                            | 14                          | 43               |
| e25  | Lavoie et al., 2012                  | TOF-MRA (1.5)                                      | 50                         | 7                            | 5                           | 18                         | 22                           | 12                          | 3                          | 8                            | 34                          | 159              |
| e25  | Lavoie et al., 2012                  | CE-MRA (1.5)                                       | 53                         | 9                            | 5                           | 12                         | 29                           | 13                          | 0                          | 9                            | 36                          | 166              |
| e26  | Pierot et al., 2012                  | TOF-MRA (3.0)                                      | 47                         | 8                            | 2                           | 15                         | 15                           | 4                           | 3                          | 6                            | 26                          | 126              |

|     |                     |               |    |   |   |    |    |   |   |   |    |     |
|-----|---------------------|---------------|----|---|---|----|----|---|---|---|----|-----|
| e26 | Pierot et al., 2012 | CE-MRA (3.0)  | 49 | 7 | 1 | 15 | 12 | 7 | 4 | 3 | 28 | 126 |
| e27 | Pierot et al., 2012 | TOF-MRA (1.5) | 51 | 7 | 0 | 16 | 15 | 2 | 8 | 8 | 19 | 126 |

**Symbols:**

& Count data were averaged from 2 observers.

§ Count data were averaged from 3 observers.

\* Multicenter study: (a) = Academic Medical Center Amsterdam; (b) = University Medical Center Leiden; (c) = University Medical Center Utrecht; (d) = Free University Medical Center Amsterdam.

**Abbreviations:**

DSA, digital subtraction angiography

MRA, magnetic resonance angiography:

TOF-MRA, time-of-flight MRA

CE-MRA, contrast-enhanced T1-weighted MRA

**eTable 8. Subgroup Analyses with Study Characteristics as Covariates**

| <b>Covariates</b>             | <b>Number of subgroups</b> | <b>LOR* estimate, (95%-CI)</b> | <b>P-value</b> |
|-------------------------------|----------------------------|--------------------------------|----------------|
| <b>Study quality score</b>    |                            |                                |                |
| A. (10.5–12.0)                | 4                          | 6.86 (5.13–9.45)               | 0.071          |
| B. (12.5–14.0)                | 20                         | 5.11 (4.10–6.37)               |                |
| <b>Prospective study</b>      |                            |                                |                |
| A. (no)                       | 5                          | 5.97 (3.63–8.47)               | 0.535          |
| B. (yes)                      | 18                         | 5.17 (4.09–6.53)               |                |
| <b>Patients per study</b>     |                            |                                |                |
| A. (< 50 patients)            | 12                         | 6.37 (4.84–8.18)               | 0.132          |
| B. (≥ 50 patients)            | 12                         | 4.84 (3.58–6.34)               |                |
| <b>Percentage of women</b>    |                            |                                |                |
| A. (< 70%)                    | 13                         | 6.15 (4.71–7.94)               | 0.209          |
| B. (≥ 70%)                    | 11                         | 4.88 (3.49–6.49)               |                |
| <b>Mean or median age</b>     |                            |                                |                |
| A. (≤ 51 years)               | 14                         | 5.18 (3.85–6.74)               | 0.300          |
| B. (> 51 years)               | 10                         | 6.35 (4.58–8.51)               |                |
| <b>Ruptured aneurysms</b>     |                            |                                |                |
| A. (<84.9% of patients)       | 13                         | 4.91 (3.46–6.62)               | 0.584          |
| B. (≥ 84.9% of patients)      | 11                         | 5.46 (4.11–7.10)               |                |
| <b>MRA sequence type</b>      |                            |                                |                |
| A. (TOF-MRA)                  | 21                         | 5.27 (4.17–6.60)               | 0.566          |
| B. (CE-MRA)                   | 10                         | 4.73 (3.24–6.37)               |                |
| <b>MR field strength</b>      |                            |                                |                |
| A. (1.5 Tesla)                | 20                         | 4.98 (3.91–6.25)               | 0.998          |
| B. (3.0 Tesla)                | 12                         | 4.97 (3.63–6.52)               |                |
| <b>MR: Parallel imaging</b>   |                            |                                |                |
| A. (No)                       | 18                         | 5.61 (4.38–7.08)               | 0.259          |
| B. (Yes)                      | 13                         | 4.60 (3.29–6.08)               |                |
| <b>MR: Voxel volume</b>       |                            |                                |                |
| A. (≤ 0.35 mm <sup>3</sup> )  | 19                         | 5.14 (3.89–6.65)               | 0.957          |
| B. (> 0.35 mm <sup>3</sup> )  | 16                         | 5.09 (3.86–6.52)               |                |
| <b>MRA image readers</b>      |                            |                                |                |
| A. (1 reader)                 | 5                          | 4.87 (2.90–7.17)               | 0.965          |
| B. (2–3 readers)              | 29                         | 4.80 (3.99–5.76)               |                |
| <b>DSA iodine concent</b>     |                            |                                |                |
| A. (240–270 mg/mL)            | 9                          | 4.47 (2.08–7.15)               | 0.498          |
| B. (300–320 mg/mL)            | 15                         | 5.38 (4.07–7.08)               |                |
| <b>Rotational angiography</b> |                            |                                |                |
| A. (no)                       | 17                         | 5.97 (3.63–8.47)               | 0.535          |
| B. (yes)                      | 7                          | 5.17 (4.09–6.53)               |                |

**DSA image readers**

|                         |    |                  |       |
|-------------------------|----|------------------|-------|
| <b>A.</b> (1 reader)    | 6  | 6.32 (4.07–8.82) | 0.388 |
| <b>B.</b> (2–3 readers) | 17 | 5.21 (4.06–6.67) |       |

---

\* LOR, logarithm of the diagnostic odds ratio

These subgroup analyses were performed with bivariate random-effects meta-analyses of sensitivity and specificity for the assessment of "sac residuals" with the study characteristics as covariates. The according differences of the LOR (logarithm of the diagnostic odd ratio) showed some trends that were not significant ( $P > 0.05$ ). The two-sided  $P$ -values were determined from the percentiles of the according posterior distributions.



## **eTable 9. Supplemental References of the Primary Studies**

- e1. Anzalone N, Righi C, Simionato F, et al (2000) Three-dimensional time-of-flight MR angiography in the evaluation of intracranial aneurysms treated with Guglielmi detachable coils. *Am J Neuroradiol* 21:746–752.
- e2. Boulin A, Pierot L (2001) Follow-up of intracranial aneurysms treated with detachable coils: comparison of gadolinium-enhanced 3D time-of-flight MR angiography and digital subtraction angiography. *Radiology* 219:108–113.
- e3. Michardière R, Bensalem D, Martin D, Baudouin N, Binnert D (2001) Comparaison de l'ARM et de l'artériographie dans le suivi des anévrismes intracrâniens traités par GDC. *J Neuroradiol* 28:75–83.
- e4. Cottier JP, Bleuzen-Couthon A, Gallas S, et al (2003) Intracranial aneurysms treated with Guglielmi detachable coils: is contrast material necessary in the follow-up with 3D time-of-flight MR angiography? *Am J Neuroradiol* 24:1797–1803.
- e5. Okahara M, Kiyosue H, Hori Y, Yamashita M, Nagatomi H, Mori H (2004) Three-dimensional time-of-flight MR angiography for evaluation of intracranial aneurysms after endosaccular packing with Guglielmi detachable coils: comparison with 3D digital subtraction angiography. *Eur Radiol* 14:1162–1168.
- e6. Yamada N, Hayashi K, Murao K, Higashi M, Iihara K (2004) Time-of-flight MR angiography targeted to coiled intracranial aneurysms is more sensitive to residual flow than is digital subtraction angiography. *Am J Neuroradiol* 25:1154–1157.
- e7. Farb RI, Nag S, Scott JN, et al (2005) Surveillance of intracranial aneurysms treated with detachable coils: a comparison of MRA techniques. *Neuroradiology* 47:507–515.
- e8. Majoie CBLM, Sprengers ME, van Rooij WJJ, et al (2005) MR angiography at 3T versus digital subtraction angiography in the follow-up of intracranial aneurysms treated with detachable coils. *Am J Neuroradiol* 26:1349–1356.
- e9. Westerlaan HE, van der Vliet AM, Hew JM, et al (2005) Time-of-flight magnetic resonance angiography in the follow-up of intracranial aneurysms treated with Guglielmi detachable coils. *Neuroradiology* 47:622–629.
- e10. Pierot L, Delcourt C, Bouquigny F, et al (2006) Follow-up of intracranial aneurysms selectively treated with coils: prospective evaluation of contrast-enhanced MR angiography. *Am J Neuroradiol* 27:744–749.
- e11. Deutschmann HA, Augustin M, Simbrunner J, et al (2007) Diagnostic accuracy of 3D time-of-flight MR angiography compared with digital subtraction angiography for follow-up of coiled intracranial aneurysms: influence of aneurysm size. *Am J Neuroradiol* 28:628–634.
- e12. Wong JH, Mitha AP, Willson M, Hudon ME, Sevick RJ, Frayne R (2007) Assessment of brain aneurysms by using high-resolution magnetic resonance angiography after endovascular coil delivery. *J Neurosurg* 107:283–289.
- e13. Gauthier JY, Caron S, Taschner CA, Lejeune JP, Pruvo JP, Leclerc X (2008) Intracranial aneurysms treated with Guglielmi detachable coils: long-term imaging follow-up with contrast-enhanced magnetic resonance angiography. *J Neurosurg* 108:443–449.
- e14. Lubicz B, Neugroschl C, Collignon L, Francois O, Baleriaux D (2008) Is digital subtraction angiography still needed for the follow-up of intracranial aneurysms treated by embolisation with detachable coils? *Neuroradiology* 50:841–848.
- e15. Ramgren B, Siemund R, Cronqvist M, et al (2008) Follow-up of intracranial aneurysms treated with detachable coils: comparison of 3D inflow MRA at 3T and 1.5T and contrast-enhanced MRA at 3T with DSA. *Neuroradiology* 50:947–954.
- e16. Urbach H, Dorenbeck U, von Falkenhausen M, et al (2008) Three-dimensional time-of-flight MR angiography at 3 T compared to digital subtraction angiography in the follow-up

of ruptured and coiled intracranial aneurysms: a prospective study. *Neuroradiology* 50:383–389.

- e17. Wikström J, Ronne-Engström E, Gal G, Enblad P, Tovi M (2008) Three-dimensional time-of-flight (3D TOF) magnetic resonance angiography (MRA) and contrast-enhanced MRA of intracranial aneurysms treated with platinum coils. *Acta Radiol* 49:190–196.
- e18. Buhk JH, Kallenberg K, Mohr A, Dechent P, Knauth M (2009) Evaluation of angiographic computed tomography in the follow-up after endovascular treatment of cerebral aneurysms – a comparative study with DSA and TOF-MRA. *Eur Radiol* 19:430–436.
- e19. Ferré JC, Carsin-Nicol B, Morandi X, et al (2009) Time-of-flight MR angiography at 3T versus digital subtraction angiography in the imaging follow-up of 51 intracranial aneurysms treated with coils. *Eur J Radiol* 72:365–369.
- e20. Kau T, Gasser J, Celedin S, et al (2009) MR angiographic follow-up of intracranial aneurysms treated with detachable coils: evaluation of a blood-pool contrast medium. *Am J Neuroradiol* 30:1524–1530.
- e21. Bakker NA, Westerlaan HE, Metzemaekers JDM, et al (2010) Feasibility of magnetic resonance angiography (MRA) follow-up as the primary imaging modality after coiling of intracranial aneurysms. *Acta Radiol* 51:226–232.
- e22. Kaufmann TJ, Huston J III, Cloft HJ, et al (2010) A prospective trial of 3T and 1.5T time-of-flight and contrast-enhanced MR angiography in the follow-up of coiled intracranial aneurysms. *Am J Neuroradiol* 31:912–918.
- e23. Schaafsma JD, Velthuis BK, Majoie CBLM, et al (2010) Intracranial aneurysms treated with coil placement: test characteristics of follow-up MR angiography – multicenter study. *Radiology* 256:209–218.
- e24. Nakiri GS, Santos AC, Abud TG, Aragon DC, Colli BO, Abud DG (2011) A comparison between magnetic resonance angiography at 3 teslas (time-of-flight and contrast-enhanced) and flat-panel digital subtraction angiography in the assessment of embolized brain aneurysms. *Clinics (Sao Paulo)* 66:641–648.
- e25. Lavoie P, Gariépy JL, Milot G, et al (2012) Residual flow after cerebral aneurysm coil occlusion: diagnostic accuracy of MR angiography. *Stroke* 43:740–746.
- e26. Pierot L, Portefaix C, Boulin A, Gauvrit JY (2012) Follow-up of coiled intracranial aneurysms: comparison of 3D time-of-flight and contrast-enhanced magnetic resonance angiography at 3T in a large, prospective series. *Eur Radiol* 22:2255–2263.
- e27. Pierot L, Portefaix C, Gauvrit JY, Boulin A (2012) Follow-Up of Coiled Intracranial Aneurysms: Comparison of 3D Time-of-Flight MR Angiography at 3T and 1.5T in a Large Prospective Series. *AJNR Am J Neuroradiol* 33:2162–2166.
